# Supplementary material for: The yin–yang of kinase activation and unfolding explains the peculiarity of Val600 in the activation segment of BRAF
Source: eLife journal article supplement (doi:10.7554/elife.12814), 2016-01-08
Supplement: supp [file elife-12814-supp-v1.zip]

Archive with 15 entries (15 files):
- elife_poa_e12814_Figure_4_figure_supplement_2.pdf
- elife_poa_e12814_Supplementary_File_1.xlsx
- elife_poa_e12814_Figure_3_figure_supplement_1.pdf
- elife_poa_e12814_Figure_4_figure_supplement_4.pdf
- elife_poa_e12814_Figure_1_figure_supplement_1.pdf
- elife_poa_e12814_Figure_4_figure_supplement_6.pdf
- elife_poa_e12814_Figure_1_figure_supplement_3.pdf
- elife_poa_e12814_Figure_3_figure_supplement_3.pdf
- elife_poa_e12814_Figure_3_figure_supplement_2.pdf
- elife_poa_e12814_Figure_5_figure_supplement_1.pdf
- elife_poa_e12814_Figure_4_figure_supplement_1.pdf
- elife_poa_e12814_Figure_4_figure_supplement_5.pdf
- elife_poa_e12814_Figure_3_figure_supplement_4.pdf
- elife_poa_e12814_Figure_4_figure_supplement_3.pdf
- elife_poa_e12814_Figure_1_figure_supplement_2.pdf
