# Supplementary material for: The yin–yang of kinase activation and unfolding explains the peculiarity of Val600 in the activation segment of BRAF
Source: eLife journal article supplement (doi:10.7554/elife.12814), 2016-01-08
Supplement: supp [file elife-12814-supp-v1.zip › elife_poa_e12814_Figure_1_figure_supplement_2.pdf]

Figure 1-figure supplement 2 – Kiel *et al.*

|                                       |      | Amino acid mutation |   |    |       |   |    |   |   |     |   |    |    |   |    |    |    |   |    |   |   |
|---------------------------------------|------|---------------------|---|----|-------|---|----|---|---|-----|---|----|----|---|----|----|----|---|----|---|---|
| Position in hydrophobic pocket region |      | A                   | C | D  | E     | F | G  | H | I | K   | L | M  | N  | P | Q  | R  | S  | T | V  | W | Y |
|                                       | V487 | 1                   | 0 | 0  | 0     | 0 | 0  | 0 | 0 | 0   | 1 | 0  | 0  | 0 | 0  | 0  | 0  | 0 | 0  | 0 | 0 |
|                                       | F468 | 0                   | 1 | 0  | 0     | 0 | 0  | 0 | 0 | 0   | 1 | 0  | 0  | 0 | 0  | 0  | 1  | 0 | 0  | 0 | 0 |
|                                       | L485 | 0                   | 0 | 0  | 0     | 1 | 0  | 0 | 0 | 0   | 0 | 0  | 0  | 0 | 0  | 0  | 1  | 0 | 0  | 1 | 0 |
|                                       | L525 | 0                   | 0 | 0  | 0     | 0 | 0  | 0 | 0 | 0   | 0 | 0  | 0  | 0 | 0  | 0  | 0  | 0 | 0  | 0 | 0 |
|                                       | A497 | 0                   | 0 | 0  | 0     | 0 | 0  | 0 | 0 | 0   | 0 | 0  | 0  | 0 | 0  | 0  | 0  | 0 | 0  | 0 | 0 |
|                                       | F498 | 0                   | 0 | 0  | 0     | 0 | 0  | 0 | 0 | 0   | 0 | 0  | 0  | 0 | 0  | 0  | 0  | 0 | 0  | 0 | 0 |
|                                       | L597 | 0                   | 0 | 0  | 0     | 0 | 0  | 0 | 0 | 0   | 0 | 0  | 0  | 1 | 12 | 18 | 13 | 0 | 10 | 0 | 0 |
|                                       | A598 | 0                   | 0 | 0  | 0     | 0 | 0  | 0 | 0 | 0   | 0 | 0  | 0  | 0 | 0  | 0  | 0  | 2 | 4  | 0 | 0 |
|                                       | T599 | 0                   | 0 | 0  | 0     | 0 | 0  | 0 | 4 | 0   | 0 | 0  | 0  | 0 | 0  | 0  | 0  | 0 | 0  | 0 | 0 |
|                                       | V600 | 12                  | 0 | 18 | 35066 | 0 | 12 | 0 | 0 | 471 | 9 | 25 | 0  | 0 | 0  | 73 | 0  | 0 | 0  | 0 | 0 |
|                                       | K601 | 0                   | 0 | 0  | 121   | 0 | 0  | 0 | 1 | 0   | 0 | 0  | 18 | 0 | 0  | 1  | 0  | 0 | 0  | 0 | 0 |
|                                       | S602 | 0                   | 0 | 0  | 0     | 0 | 0  | 0 | 0 | 0   | 0 | 0  | 0  | 0 | 0  | 0  | 0  | 0 | 0  | 0 | 0 |
|                                       | R603 | 0                   | 0 | 0  | 0     | 0 | 0  | 0 | 0 | 0   | 1 | 0  | 0  | 0 | 0  | 0  | 0  | 0 | 0  | 0 | 0 |
|                                       | W604 | 0                   | 0 | 0  | 0     | 0 | 2  | 0 | 0 | 0   | 0 | 0  | 0  | 0 | 0  | 1  | 0  | 0 | 0  | 0 | 0 |
