# Supplementary material for: The yin–yang of kinase activation and unfolding explains the peculiarity of Val600 in the activation segment of BRAF
Source: eLife journal article supplement (doi:10.7554/elife.12814), 2016-01-08

**Figure 1-figure supplement 3 – Kiel *et al.***

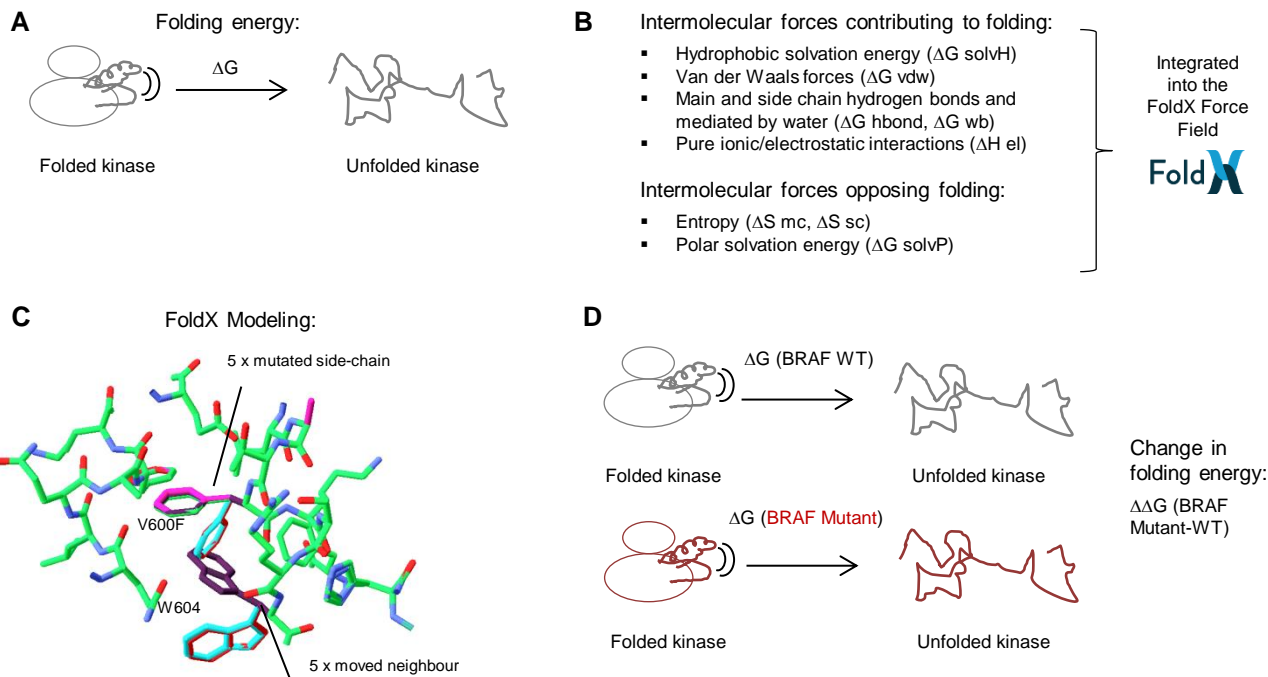

**E** Pipeline of FoldX-based modeling of BRAF WT and mutants in the hydrophobic pocket:

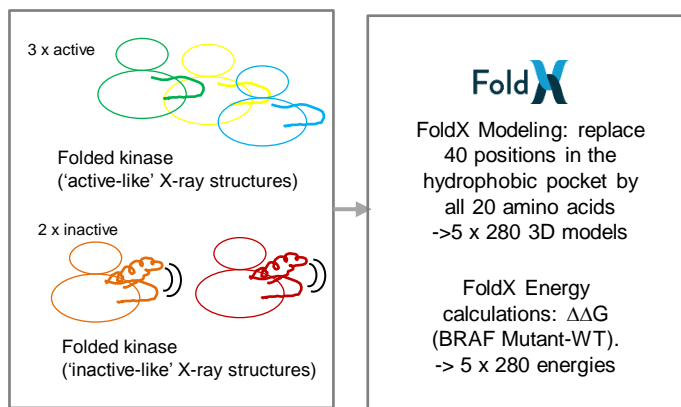

**F** FoldX energies: data interpretation and additional analysis

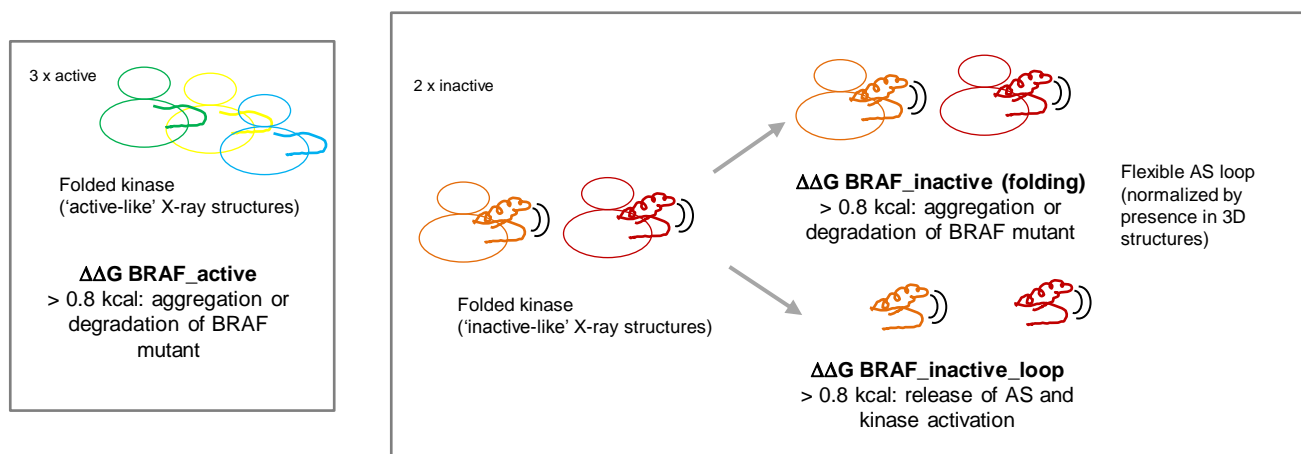

Supplement: supp [file elife-12814-supp-v1.zip › elife_poa_e12814_Figure_1_figure_supplement_3.pdf]
