# Supplementary material for: The yin–yang of kinase activation and unfolding explains the peculiarity of Val600 in the activation segment of BRAF
Source: eLife journal article supplement (doi:10.7554/elife.12814), 2016-01-08
Supplement: supp [file elife-12814-supp-v1.zip › elife_poa_e12814_Supplementary_File_1.xlsx]

## Sheet: summary
Supplementary file 1. Summary of structure-energy and statistical properties of mutations in the hydrophobic pocket of BRAF and parameters used for random forest analyses.
Supplementary file 1 - sheet 1. Summary of structure-energy and statistical properties of mutations in the hydrophobic pocket of BRAF.
Position	Mutation	Cancer frequency	AVERAGE (INACTIVE) (kcal/mol)	AVERAGE (ACTIVE) (kcal/mol)	AVERAGE corrected by percentage in structures (kcal/mol)		SD (INACTIVE) (kcal/mol)	SD (ACTIVE) (kcal/mol)		Nucleotide substitution freqency	INACTIVE b-factor Average	ACTIVE b-factor Average	Change in codon usage frequency	Salt bridge (with Arg) (kcal/mol)	Presence in 3D structure (%)	Change in hydrophobic solvation (kcal/mol)	B-factor 3TV6-A	B-factor 3TV6-B	B-factor 4EHE-A	B-factor 4EHE-B	Average B-factor	B-factor 4MNE-B	B-factor 4MNE-C	B-factor 4MNF-A	B-factor 4MNF-B	Average B-factor
468	F468K	0	3.19833	0.77716	3.19833		2.03126	0.224028		3.125e-23	77.75	76	11.55		100	4.37	83	68	92	68	77.75			61	91	76
468	F468Q	0	2.59833	1.25666	2.59833		1.76048	0.588586		3.125e-23	77.75	76	6.3		100	2.98	83	68	92	68	77.75			61	91	76
468	F468E	0	3.06167	1.78447	3.06167		2.3667	0.788609		3.125e-23	77.75	76	18		100	4.38	83	68	92	68	77.75			61	91	76
468	F468P	0	2.48	1.43383	2.48		1.6315	0.522375		6.25e-23	77.75	76	-1.65		100	1.19	83	68	92	68	77.75			61	91	76
485	L485N	0	4.13333	1.74063	4.13333		0.111219	0.567601		3.125e-23	75.25	68.75	5.5		100	3.46	77	62	89	73	75.25	80	67	52	76	68.75
485	L485C	0	3.6825	1.77838	3.6825		0.164931	0.495687		3.125e-23	75.25	68.75	-1.55		100	1.57	77	62	89	73	75.25	80	67	52	76	68.75
485	L485D	0	4.6775	2.14078	4.6775		0.117173	0.751135		3.125e-23	75.25	68.75	11.55		100	4.86	77	62	89	73	75.25	80	67	52	76	68.75
485	L485H	0	4.89583	3.15063	4.89583		3.38267	4.14008		3.125e-23	75.25	68.75	0.05		100	4.11	77	62	89	73	75.25	80	67	52	76	68.75
487	V487N	0	0.0758333	-0.48722	0.0758333		0.658393	0.763557		3.125e-23	82.75	109.25	-10.8		100	2.85	83	69	97	82	82.75	117	130	60	130	109.25
487	V487Y	0	-0.045	-0.0271041	-0.045		0.317304	0.259463		3.125e-23	82.75	109.25	-15.1		100	0.42	83	69	97	82	82.75	117	130	60	130	109.25
487	V487C	0	0.493333	0.175493	0.493333		0.210771	0.246187		3.125e-23	82.75	109.25	-17.85		100	0.96	83	69	97	82	82.75	117	130	60	130	109.25
487	V487H	0	0.8725	0.33126	0.8725		0.30849	0.475178		3.125e-23	82.75	109.25	-16.25		100	3.5	83	69	97	82	82.75	117	130	60	130	109.25
497	A497M	0	-0.536667	-0.831289	-0.536667		0.691906	0.675575		1.5625e-23	76.5	38.25	-6.2		100	-1.83	80	67	84	75	76.5	30	37	40	46	38.25
497	A497W	0	0.296667	-0.441757	0.296667		0.519726	0.462026		1.5625e-23	76.5	38.25	-15.7		100	-1.39	80	67	84	75	76.5	30	37	40	46	38.25
497	A497K	0	-0.153333	-0.254546	-0.153333		0.176909	0.252103		3.125e-23	76.5	38.25	-0.05		100	2.48	80	67	84	75	76.5	30	37	40	46	38.25
497	A497Q	0	0.3075	-0.159688	0.3075		0.39062	0.365784		3.125e-23	76.5	38.25	-5.3		100	1.09	80	67	84	75	76.5	30	37	40	46	38.25
498	F498K	0	4.645	3.72646	4.645		0.241943	0.879598		3.125e-23	74.25	46.25	8.05		100	4.37	77	66	81	73	74.25	44	41	50	50	46.25
498	F498Q	0	3.94	4.37977	3.94		0.236758	1.10509		3.125e-23	74.25	46.25	2.8		100	2.98	77	66	81	73	74.25	44	41	50	50	46.25
498	F498E	0	5.9225	4.89743	5.9225		0.0733764	1.17398		3.125e-23	74.25	46.25	14.5		100	4.38	77	66	81	73	74.25	44	41	50	50	46.25
525	L525Y	0	3.14917	1.40199	3.14917		0.757873	1.67782		3.125e-23	60.25	48	-26.5		100	1.03	58	51	70	62	60.25	53	47	32	60	48
525	L525N	0	2.6025	2.20398	2.6025		0.155921	0.500321		3.125e-23	60.25	48	-22.2		100	3.46	58	51	70	62	60.25	53	47	32	60	48
525	L525C	0	2.97	2.37353	2.97		0.415802	0.621091		3.125e-23	60.25	48	-29.25		100	1.57	58	51	70	62	60.25	53	47	32	60	48
525	L525D	0	4.3025	3.65827	4.3025		0.166358	0.866415		3.125e-23	60.25	48	-16.15		100	4.86	58	51	70	62	60.25	53	47	32	60	48
597	L597W	0	4.23417	0.68747	3.47807		2.08486	0.381399		1.5625e-23	68.75	37.75	5.9		82.1429	0.47	77	58	78	62	68.75	27	34	30	60	37.75
597	L597Y	0	2.76583	0.207037	2.27193		2.13443	0.628048		3.125e-23	68.75	37.75	6.9		82.1429	1.03	77	58	78	62	68.75	27	34	30	60	37.75
597	L597N	0	2.49583	0.755034	2.05015		0.0852225	0.368608		3.125e-23	68.75	37.75	11.2		82.1429	3.46	77	58	78	62	68.75	27	34	30	60	37.75
597	L597D	0	3.82333	0.922325	3.1406		0.211717	0.517206		3.125e-23	68.75	37.75	17.25		82.1429	4.86	77	58	78	62	68.75	27	34	30	60	37.75
597	L597C	0	2.44417	1.02551	2.00771		0.0528219	0.264768		3.125e-23	68.75	37.75	4.15		82.1429	1.57	77	58	78	62	68.75	27	34	30	60	37.75
598	A598M	0	-0.104167	4.87746	-0.0744048		0.555296	2.72202		1.5625e-23	74.25	31.5	3.7		71.4286	-1.83	83	63	85	66	74.25	21	30	33	42	31.5
598	A598W	0	1.64667	32.8417	1.17619		0.789376	8.53818		1.5625e-23	74.25	31.5	-5.8		71.4286	-1.39	83	63	85	66	74.25	21	30	33	42	31.5
598	A598Q	0	0.249167	7.967	0.177976		0.380776	2.77959		3.125e-23	74.25	31.5	4.6		71.4286	1.09	83	63	85	66	74.25	21	30	33	42	31.5
598	A598K	0	-0.0316667	10.0552	-0.022619		0.472341	3.03625		3.125e-23	74.25	31.5	9.85		71.4286	2.48	83	63	85	66	74.25	21	30	33	42	31.5
599	T599W	0	-0.0283333	0.440565	-0.0202381		0.23748	0.503898		1.5625e-23	77	35.75	-2		71.4286	-2.08	87	66	88	67	77	26	40	35	42	35.75
599	T599C	0	0.355833	-0.0801975	0.254167		0.151145	0.234873		3.125e-23	77	35.75	-3.75		71.4286	-0.98	87	66	88	67	77	26	40	35	42	35.75
599	T599D	0	0.825	0.29848	0.589286		0.0892901	0.378972		3.125e-23	77	35.75	9.35	1.7	71.4286	2.31	87	66	88	67	77	26	40	35	42	35.75
599	T599F	0	-0.305	0.417066	-0.217857		0.297123	0.189991		3.125e-23	77	35.75	3.85		71.4286	-2.58	87	66	88	67	77	26	40	35	42	35.75
599	T599Y	0	-0.215833	0.499359	-0.154167		0.319331	0.193252		3.125e-23	77	35.75	-1		71.4286	-1.52	87	66	88	67	77	26	40	35	42	35.75
599	T599N	0	-0.679167	0.550621	-0.485119		0.16245	0.325592		3.125e-23	77	35.75	3.3		71.4286	0.91	87	66	88	67	77	26	40	35	42	35.75
599	T599H	0	-0.5175	0.747489	-0.369643		0.284289	0.189328		3.125e-23	77	35.75	-2.15		71.4286	1.56	87	66	88	67	77	26	40	35	42	35.75
600	V600C	0	0.85	-0.0932668	0.607143		0.725534	0.46896		3.125e-23	81	54	-17.85		71.4286	0.96	92	69	92	71	81	32	43	66	75	54
600	V600Y	0	11.4792	-0.0507664	8.1994		14.9488	0.843986		3.125e-23	81	54	-15.1		71.4286	0.42	92	69	92	71	81	32	43	66	75	54
600	V600N	0	1.57167	0.355266	1.12262		0.960358	0.65872		3.125e-23	81	54	-10.8		71.4286	2.85	92	69	92	71	81	32	43	66	75	54
600	V600H	0	6.47083	0.613584	4.62202		9.72428	0.853086		3.125e-23	81	54	-16.25		71.4286	3.5	92	69	92	71	81	32	43	66	75	54
601	K601W	0	0.158333	-0.364897	0.0565476		0.396228	0.208845		1.5625e-23	84.25	70	-11.2		35.7143	-3.87	96	72	95	74	84.25	50	90			70
601	K601F	0	0.799167	0.111686	0.285417		0.367113	0.018634		3.125e-23	84.25	70	-5.35		35.7143	-4.37	96	72	95	74	84.25	50	90			70
601	K601C	0	1.0375	0.59217	0.370536		0.313024	0.226127		3.125e-23	84.25	70	-12.95		35.7143	-2.77	96	72	95	74	84.25	50	90			70
602	S602M	0	0.5625	1.11082	0.140625		0.803528	0.444289		1.5625e-23	86.75	85.5	7.7		25	-3.44	100	73	97	77	86.75	78	93			85.5
602	S602E	0	0.6525	0.503421	0.163125		0.684891	0.358931		3.125e-23	86.75	85.5	20.3	1.7	25	0.88	100	73	97	77	86.75	78	93			85.5
602	S602Q	0	-0.0133333	1.1378	-0.00333333		0.425598	0.450106		3.125e-23	86.75	85.5	8.6		25	-0.52	100	73	97	77	86.75	78	93			85.5
602	S602K	0	0.911667	1.2901	0.227917		0.937859	0.542259		3.125e-23	86.75	85.5	13.85		25	0.87	100	73	97	77	86.75	78	93			85.5
603	R603M	0	0.125833	-0.0537845	0.0269643		0.531831	0.0799833		1.5625e-23	93	90	16		21.4286	-4.43	103	81	102	86	93	90				90
603	R603F	0	0.474167	-0.250298	0.101607		0.300801	0.170677		3.125e-23	93	90	12.35		21.4286	-4.49	103	81	102	86	93	90				90
603	R603Y	0	0.526667	-0.187266	0.112857		0.436585	0.114407		3.125e-23	93	90	7.5		21.4286	-3.43	103	81	102	86	93	90				90
603	R603N	0	0.0908333	0.297193	0.0194643		0.269291	0.123117		3.125e-23	93	90	11.8		21.4286	-1	103	81	102	86	93	90				90
604	W604N	0	1.4625	-0.261126	0.208929		0.935552	0.185213		1.5625e-23	88	61	5.3		14.2857	2.99	107	76		81	88	61				61
604	W604H	0	1.84083	0.342249	0.262976		0.927827	0.146026		3.125e-23	88	61	-0.15		14.2857	3.64	107	76		81	88	61				61
604	W604I	0	0.82	-0.726373	0.117143		0.502666	0.386736		4.688e-23	88	61	1.93333		14.2857	-0.47	107	76		81	88	61				61
468	F468M	0	0.580833	-0.367023	0.580833		0.7246	0.504408		6.25e-16	77.75	76	5.4		100	0.06	83	68	92	68	77.75			61	91	76
468	F468R	0	3.0525	0.607336	3.0525		2.0591	0.466149		6.25e-16	77.75	76	-12.2		100	4.49	83	68	92	68	77.75			61	91	76
468	F468H	0	2.655	1.28151	2.655		1.32799	0.425916		6.25e-16	77.75	76	-6.5		100	4.14	83	68	92	68	77.75			61	91	76
468	F468N	0	2.54917	1.44569	2.54917		1.6632	0.435814		6.25e-16	77.75	76	-0.2		100	3.49	83	68	92	68	77.75			61	91	76
468	F468A	0	2.3625	1.79791	2.3625		1.81532	0.543429		6.25e-16	77.75	76	1.7		100	1.89	83	68	92	68	77.75			61	91	76
468	F468D	0	3.02417	1.99319	3.02417		2.14557	0.817602		6.25e-16	77.75	76	5.4		100	4.89	83	68	92	68	77.75			61	91	76
468	F468W	0	3.25667	2.0989	3.25667		2.08691	1.82544		6.25e-16	77.75	76	-4.1		100	0.5	83	68	92	68	77.75			61	91	76
468	F468G	0	2.63667	2.20097	2.63667		1.72104	0.773136		6.25e-16	77.75	76	-6.1		100	2.81	83	68	92	68	77.75			61	91	76
468	F468T	0	3.2825	2.36171	3.2825		2.31513	0.87379		6.25e-16	77.75	76	-4.1		100	2.58	83	68	92	68	77.75			61	91	76
485	L485K	0	3.88667	1.39759	3.88667		0.367852	0.375563		6.25e-16	75.25	68.75	20.3		100	4.34	77	62	89	73	75.25	80	67	52	76	68.75
485	L485T	0	3.96333	1.76551	3.96333		0.200605	0.738766		6.25e-16	75.25	68.75	-6.4		100	2.55	77	62	89	73	75.25	80	67	52	76	68.75
485	L485A	0	3.515	1.79835	3.515		0.132905	0.467498		6.25e-16	75.25	68.75	-5		100	1.86	77	62	89	73	75.25	80	67	52	76	68.75
485	L485E	0	4.3175	1.86955	4.3175		0.0931397	0.622303		6.25e-16	75.25	68.75	28.2		100	4.35	77	62	89	73	75.25	80	67	52	76	68.75
485	L485G	0	4.79583	2.48643	4.79583		0.232475	0.701192		6.25e-16	75.25	68.75	3.8		100	2.78	77	62	89	73	75.25	80	67	52	76	68.75
485	L485P	0	5.33583	3.05336	5.33583		2.63739	0.788246		6.25e-16	75.25	68.75	-5.6		100	1.16	77	62	89	73	75.25	80	67	52	76	68.75
485	L485Y	0	6.505	1.45049	6.505		2.00988	1.09554		1.25e-15	75.25	68.75	1.2		100	1.03	77	62	89	73	75.25	80	67	52	76	68.75
485	L485Q	0	3.27833	1.53872	3.27833		0.356468	0.512176		1.25e-15	75.25	68.75	10.6		100	2.95	77	62	89	73	75.25	80	67	52	76	68.75
485	L485R	0	4.295	1.94156	4.295		0.828959	0.546824		1.25e-15	75.25	68.75	-0.95		100	4.46	77	62	89	73	75.25	80	67	52	76	68.75
485	L485I	0	1.78833	0.167823	1.78833		0.284088	0.595892		1.875e-15	75.25	68.75	2.13333		100	0	77	62	89	73	75.25	80	67	52	76	68.75
485	L485S	1	4.58	2.01909	4.58		0.204362	0.755235		2.5e-15	75.25	68.75	-0.55		100	3.47	77	62	89	73	75.25	80	67	52	76	68.75
487	V487K	0	0.515833	-0.266573	0.515833		0.442872	0.63131		6.25e-16	82.75	109.25	4		100	3.73	83	69	97	82	82.75	117	130	60	130	109.25
487	V487T	0	1.11667	-0.0138284	1.11667		0.365173	0.566941		6.25e-16	82.75	109.25	-22.7		100	1.94	83	69	97	82	82.75	117	130	60	130	109.25
487	V487W	0	0.405	0.277923	0.405		0.452357	0.616752		6.25e-16	82.75	109.25	-16.1		100	-0.14	83	69	97	82	82.75	117	130	60	130	109.25
487	V487S	0	1.0875	0.460057	1.0875		0.155103	0.664377		6.25e-16	82.75	109.25	-24.4		100	2.86	83	69	97	82	82.75	117	130	60	130	109.25
487	V487P	0	1.7525	3.85489	1.7525		0.168206	2.72703		6.25e-16	82.75	109.25	-21.9		100	0.55	83	69	97	82	82.75	117	130	60	130	109.25
487	V487D	0	0.704167	-0.590844	0.704167		0.461902	1.1591		1.25e-15	82.75	109.25	-4.75		100	4.25	83	69	97	82	82.75	117	130	60	130	109.25
487	V487F	0	-0.125833	-0.163723	-0.125833		0.398599	0.27833		1.25e-15	82.75	109.25	-10.25		100	-0.64	83	69	97	82	82.75	117	130	60	130	109.25
487	V487R	0	1.03083	0.0152236	1.03083		0.513959	0.512583		1.25e-15	82.75	109.25	-17.25		100	3.85	83	69	97	82	82.75	117	130	60	130	109.25
487	V487Q	0	0.569167	0.0585149	0.569167		0.378188	0.623031		1.25e-15	82.75	109.25	-5.7		100	2.34	83	69	97	82	82.75	117	130	60	130	109.25
487	V487I	0	-0.318333	-0.352413	-0.318333		0.142754	0.273863		1.875e-15	82.75	109.25	-14.1667		100	-0.61	83	69	97	82	82.75	117	130	60	130	109.25
497	A497F	0	0.275	-0.736417	0.275		0.233335	0.590891		6.25e-16	76.5	38.25	-8.1		100	-1.89	80	67	84	75	76.5	30	37	40	46	38.25
497	A497Y	0	0.5075	-0.73433	0.5075		0.155863	0.695615		6.25e-16	76.5	38.25	-12.9		100	-0.83	80	67	84	75	76.5	30	37	40	46	38.25
497	A497L	0	-0.708333	-0.706795	-0.708333		0.497628	0.520996		6.25e-16	76.5	38.25	-9.1		100	-1.86	80	67	84	75	76.5	30	37	40	46	38.25
497	A497R	0	0.2325	-0.409217	0.2325		0.597953	0.364032		6.25e-16	76.5	38.25	-17.6		100	2.6	80	67	84	75	76.5	30	37	40	46	38.25
497	A497N	0	0.3425	0.0634798	0.3425		0.708059	0.251852		6.25e-16	76.5	38.25	-9		100	1.6	80	67	84	75	76.5	30	37	40	46	38.25
497	A497H	0	0.764167	0.10258	0.764167		0.22228	0.483522		6.25e-16	76.5	38.25	-13.6		100	2.25	80	67	84	75	76.5	30	37	40	46	38.25
497	A497I	0	0.3625	0.284822	0.3625		0.464428	0.84219		6.25e-16	76.5	38.25	-7.1		100	-1.86	80	67	84	75	76.5	30	37	40	46	38.25
497	A497C	0	0.755	0.400678	0.755		0.0855464	0.257174		6.25e-16	76.5	38.25	-16.3		100	-0.29	80	67	84	75	76.5	30	37	40	46	38.25
497	A497E	0	0.665833	-0.301278	0.665833		0.117972	0.181097		1.25e-15	76.5	38.25	6.4		100	2.49	80	67	84	75	76.5	30	37	40	46	38.25
498	F498M	0	1.345	1.55088	1.345		0.203179	0.512106		6.25e-16	74.25	46.25	1.9		100	0.06	77	66	81	73	74.25	44	41	50	50	46.25
498	F498W	0	4.42167	1.81279	4.42167		1.44003	1.41019		6.25e-16	74.25	46.25	-7.6		100	0.5	77	66	81	73	74.25	44	41	50	50	46.25
498	F498H	0	3.78167	3.24435	3.78167		0.165959	0.869804		6.25e-16	74.25	46.25	-5.5		100	4.14	77	66	81	73	74.25	44	41	50	50	46.25
498	F498R	0	5.08917	3.557	5.08917		0.510908	1.07827		6.25e-16	74.25	46.25	-9.5		100	4.49	77	66	81	73	74.25	44	41	50	50	46.25
498	F498A	0	4.915	4.29981	4.915		0.0987651	1.08862		6.25e-16	74.25	46.25	8.1		100	1.89	77	66	81	73	74.25	44	41	50	50	46.25
498	F498T	0	4.5975	4.65576	4.5975		0.519775	1.11544		6.25e-16	74.25	46.25	-1.2		100	2.58	77	66	81	73	74.25	44	41	50	50	46.25
498	F498N	0	5.58	4.76045	5.58		0.0813522	1.17364		6.25e-16	74.25	46.25	-0.9		100	3.49	77	66	81	73	74.25	44	41	50	50	46.25
498	F498G	0	6.25083	5.37974	6.25083		0.393896	1.33324		6.25e-16	74.25	46.25	2.4		100	2.81	77	66	81	73	74.25	44	41	50	50	46.25
498	F498D	0	6.575	5.68264	6.575		0.164566	1.35291		6.25e-16	74.25	46.25	5.6		100	4.89	77	66	81	73	74.25	44	41	50	50	46.25
498	F498P	0	8.06417	7.34068	8.06417		1.4964	1.77879		6.25e-16	74.25	46.25	-0.4		100	1.19	77	66	81	73	74.25	44	41	50	50	46.25
525	L525K	0	3.22083	2.46132	3.22083		0.315262	0.60111		6.25e-16	60.25	48	-7.4		100	4.34	58	51	70	62	60.25	53	47	32	60	48
525	L525E	0	3.46	2.96815	3.46		0.255094	0.684811		6.25e-16	60.25	48	0.5		100	4.35	58	51	70	62	60.25	53	47	32	60	48
525	L525A	0	3.125	3.00758	3.125		0.147864	0.708708		6.25e-16	60.25	48	-32.7		100	1.86	58	51	70	62	60.25	53	47	32	60	48
525	L525S	0	3.62417	3.40546	3.62417		0.377659	0.903359		6.25e-16	60.25	48	-35.8		100	3.47	58	51	70	62	60.25	53	47	32	60	48
525	L525T	0	3.52917	3.45848	3.52917		0.184413	1.00795		6.25e-16	60.25	48	-34.1		100	2.55	58	51	70	62	60.25	53	47	32	60	48
525	L525W	0	5.30833	3.73624	5.30833		2.5504	2.34298		6.25e-16	60.25	48	-27.5		100	0.47	58	51	70	62	60.25	53	47	32	60	48
525	L525G	0	5.06417	4.40473	5.06417		0.229722	1.06447		6.25e-16	60.25	48	-23.9		100	2.78	58	51	70	62	60.25	53	47	32	60	48
525	L525F	0	0.903333	0.396481	0.903333		0.982208	0.494501		1.25e-15	60.25	48	-21.65		100	-0.03	58	51	70	62	60.25	53	47	32	60	48
525	L525H	0	2.8525	2.08803	2.8525		1.04269	0.860698		1.25e-15	60.25	48	-27.65		100	4.11	58	51	70	62	60.25	53	47	32	60	48
525	L525I	0	1.995	2.03104	1.995		1.00558	0.696717		1.875e-15	60.25	48	-25.5667		100	0	58	51	70	62	60.25	53	47	32	60	48
597	L597K	0	3.12583	0.210855	2.56765		0.626831	0.432142		6.25e-16	68.75	37.75	17.1		82.1429	4.34	77	58	78	62	68.75	27	34	30	60	37.75
597	L597M	0	-0.1	0.296069	-0.0821429		0.40265	0.32924		6.25e-16	68.75	37.75	15.4		82.1429	0.03	77	58	78	62	68.75	27	34	30	60	37.75
597	L597E	0	3.095	0.909607	2.54232		0.366172	0.528553		6.25e-16	68.75	37.75	22.1		82.1429	4.35	77	58	78	62	68.75	27	34	30	60	37.75
597	L597A	0	3.22417	0.918933	2.64842		0.152522	0.309152		6.25e-16	68.75	37.75	9.1		82.1429	1.86	77	58	78	62	68.75	27	34	30	60	37.75
597	L597G	0	2.2875	1.09326	1.87902		1.26027	0.372164		6.25e-16	68.75	37.75	9.4		82.1429	2.78	77	58	78	62	68.75	27	34	30	60	37.75
597	L597S	13	3.50833	1.13365	2.88185		0.172565	0.398122		6.25e-16	68.75	37.75	4.8		82.1429	3.47	77	58	78	62	68.75	27	34	30	60	37.75
597	L597T	0	4.16333	1.32054	3.41988		1.29928	0.514661		6.25e-16	68.75	37.75	7.9		82.1429	2.55	77	58	78	62	68.75	27	34	30	60	37.75
597	L597F	0	0.315833	0.0168218	0.259435		2.01596	0.525124		1.25e-15	68.75	37.75	11.75		82.1429	-0.03	77	58	78	62	68.75	27	34	30	60	37.75
597	L597H	0	2.41667	1.08809	1.98512		0.820779	0.351416		1.25e-15	68.75	37.75	5.75		82.1429	4.11	77	58	78	62	68.75	27	34	30	60	37.75
598	A598C	0	0.1775	1.16049	0.126786		0.399229	0.702523		6.25e-16	74.25	31.5	-8.7		71.4286	-0.29	83	63	85	66	74.25	21	30	33	42	31.5
598	A598I	0	0.015	4.65637	0.0107143		0.388739	1.87231		6.25e-16	74.25	31.5	-2.9		71.4286	-1.86	83	63	85	66	74.25	21	30	33	42	31.5
598	A598N	0	0.4275	4.76891	0.305357		0.343488	1.64674		6.25e-16	74.25	31.5	-1.9		71.4286	1.6	83	63	85	66	74.25	21	30	33	42	31.5
598	A598L	0	-0.236667	6.0507	-0.169048		0.450522	2.74176		6.25e-16	74.25	31.5	-5.8		71.4286	-1.86	83	63	85	66	74.25	21	30	33	42	31.5
598	A598R	0	-0.0575	14.6272	-0.0410714		0.333143	3.74908		6.25e-16	74.25	31.5	-13.9		71.4286	2.6	83	63	85	66	74.25	21	30	33	42	31.5
598	A598H	0	0.918333	16.1097	0.655952		0.410074	4.91166		6.25e-16	74.25	31.5	-8.2		71.4286	2.25	83	63	85	66	74.25	21	30	33	42	31.5
598	A598F	0	0.105833	20.9966	0.0755952		0.324834	7.55549		6.25e-16	74.25	31.5	-1.7		71.4286	-1.89	83	63	85	66	74.25	21	30	33	42	31.5
598	A598Y	0	0.501667	25.4385	0.358333		0.264878	6.95231		6.25e-16	74.25	31.5	-6.6		71.4286	-0.83	83	63	85	66	74.25	21	30	33	42	31.5
598	A598E	0	0.888333	9.47489	0.634524		0.277287	2.86138		1.25e-15	74.25	31.5	16.3		71.4286	2.49	83	63	85	66	74.25	21	30	33	42	31.5
599	T599M	0	-1.04667	-0.777314	-0.747619		0.267661	0.406186		6.25e-16	77	35.75	7.5		71.4286	-2.52	87	66	88	67	77	26	40	35	42	35.75
599	T599V	0	-0.0633333	0.122141	-0.0452381		0.174373	0.163487		6.25e-16	77	35.75	-7.8		71.4286	-1.94	87	66	88	67	77	26	40	35	42	35.75
599	T599E	0	0.156667	0.220994	0.111905		0.0745085	0.129052		6.25e-16	77	35.75	14.2	1.7	71.4286	1.8	87	66	88	67	77	26	40	35	42	35.75
599	T599G	0	0.243333	0.523632	0.17381		0.0820569	0.355144		6.25e-16	77	35.75	1.5		71.4286	0.23	87	66	88	67	77	26	40	35	42	35.75
599	T599Q	0	-0.743333	0.187405	-0.530952		0.162331	0.215896		1.25e-15	77	35.75	8.4		71.4286	0.4	87	66	88	67	77	26	40	35	42	35.75
599	T599R	0	-0.935833	0.467433	-0.668452		0.231652	0.281775		1.25e-15	77	35.75	-5.9		71.4286	1.91	87	66	88	67	77	26	40	35	42	35.75
599	T599L	0	-0.913333	0.604961	-0.652381		0.324102	0.187662		1.25e-15	77	35.75	-7.75		71.4286	-2.55	87	66	88	67	77	26	40	35	42	35.75
600	V600K	471	2.12083	-0.157507	1.51488		1.99722	0.552962		6.25e-16	81	54	4		71.4286	3.73	92	69	92	71	81	32	43	66	75	54
600	V600P	0	1.43667	0.0186794	1.02619		1.03849	0.286248		6.25e-16	81	54	-21.9		71.4286	0.55	92	69	92	71	81	32	43	66	75	54
600	V600T	0	1.04333	0.0950929	0.745238		1.18438	0.230996		6.25e-16	81	54	-22.7		71.4286	1.94	92	69	92	71	81	32	43	66	75	54
600	V600W	0	5.725	0.186347	4.08929		8.99847	1.36372		6.25e-16	81	54	-16.1		71.4286	-0.14	92	69	92	71	81	32	43	66	75	54
600	V600S	0	1.63333	0.678104	1.16667		1.08142	0.674033		6.25e-16	81	54	-24.4		71.4286	2.86	92	69	92	71	81	32	43	66	75	54
600	V600D	18	2.81417	0.517271	2.01012		1.712	0.590289		1.25e-15	81	54	-4.75	1.7	71.4286	4.25	92	69	92	71	81	32	43	66	75	54
600	V600F	0	7.4225	-0.0869738	5.30179		8.28678	1.15061		1.25e-15	81	54	-10.25		71.4286	-0.64	92	69	92	71	81	32	43	66	75	54
600	V600R	73	2.7475	0.115379	1.9625		1.9968	0.644646		1.25e-15	81	54	-17.25		71.4286	3.85	92	69	92	71	81	32	43	66	75	54
600	V600Q	0	1.46167	0.150662	1.04405		1.46939	0.543604		1.25e-15	81	54	-5.7		71.4286	2.34	92	69	92	71	81	32	43	66	75	54
600	V600I	0	0.288333	-0.492878	0.205952		1.11543	0.209408		1.875e-15	81	54	-14.1667		71.4286	-0.61	92	69	92	71	81	32	43	66	75	54
601	K601M	0	-0.259167	-0.503328	-0.0925595		0.342384	0.243141		6.25e-16	84.25	70	-1.7		35.7143	-4.31	96	72	95	74	84.25	50	90			70
601	K601V	0	0.786667	0.68941	0.280952		0.0816125	0.266237		6.25e-16	84.25	70	-17		35.7143	-3.73	96	72	95	74	84.25	50	90			70
601	K601A	0	0.596667	0.811379	0.213095		0.206984	0.314582		6.25e-16	84.25	70	-8		35.7143	-2.48	96	72	95	74	84.25	50	90			70
601	K601P	0	4.35167	1.10298	1.55417		0.801735	0.442227		6.25e-16	84.25	70	-7.3		35.7143	-3.18	96	72	95	74	84.25	50	90			70
601	K601T	0	0.526667	1.16915	0.188095		0.404887	0.472665		6.25e-16	84.25	70	-9.2		35.7143	-1.79	96	72	95	74	84.25	50	90			70
601	K601G	0	1.29833	1.27553	0.46369		0.561084	0.528477		6.25e-16	84.25	70	-7.7		35.7143	-1.56	96	72	95	74	84.25	50	90			70
601	K601L	0	-0.12	-0.293252	-0.0428571		0.157307	0.177447		1.25e-15	84.25	70	-16.95		35.7143	-4.34	96	72	95	74	84.25	50	90			70
601	K601R	1	0.153333	0.216553	0.0547619		0.290621	0.186361		1.25e-15	84.25	70	-15.1		35.7143	0.12	96	72	95	74	84.25	50	90			70
601	K601Y	0	0.708333	0.589285	0.252976		0.59159	0.249341		1.25e-15	84.25	70	-10.2		35.7143	-3.31	96	72	95	74	84.25	50	90			70
601	K601D	0	1.80667	0.805667	0.645238		1.04792	0.321416		1.25e-15	84.25	70	0.15	1.7	35.7143	0.52	96	72	95	74	84.25	50	90			70
601	K601H	0	1.03667	1.1417	0.370238		0.272141	0.456966		1.25e-15	84.25	70	-11.35		35.7143	-0.23	96	72	95	74	84.25	50	90			70
601	K601S	0	0.840833	1.05556	0.300298		0.627918	0.424083		1.875e-15	84.25	70	-9.66667		35.7143	-0.87	96	72	95	74	84.25	50	90			70
602	S602D	0	0.811667	0.326178	0.202917		0.674871	0.121007		6.25e-16	86.75	85.5	7.7	1.7	25	1.39	100	73	97	77	86.75	78	93			85.5
602	S602N	0	0.00166667	0.887737	0.000416667		0.474243	0.368916		6.25e-16	86.75	85.5	2.1		25	-0.01	100	73	97	77	86.75	78	93			85.5
602	S602H	0	0.811667	0.998534	0.202917		0.805028	0.416101		6.25e-16	86.75	85.5	-4.2		25	0.64	100	73	97	77	86.75	78	93			85.5
602	S602W	0	0.9325	1.11513	0.233125		0.792867	0.476158		6.25e-16	86.75	85.5	-1.8		25	-3	100	73	97	77	86.75	78	93			85.5
602	S602R	0	0.491667	1.21293	0.122917		0.935801	0.471637		6.25e-16	86.75	85.5	-9.9		25	0.99	100	73	97	77	86.75	78	93			85.5
602	S602G	0	0.415	1.36641	0.10375		0.207167	0.600398		6.25e-16	86.75	85.5	-3.8		25	-0.69	100	73	97	77	86.75	78	93			85.5
602	S602V	0	1.1825	1.42787	0.295625		0.985634	0.574638		6.25e-16	86.75	85.5	-3.7		25	-2.86	100	73	97	77	86.75	78	93			85.5
602	S602L	0	0.29	0.973741	0.0725		0.684212	0.400692		1.875e-15	86.75	85.5	-3.73333		25	-3.47	100	73	97	77	86.75	78	93			85.5
602	S602I	0	1.36667	1.10417	0.341667		1.30801	0.445935		1.875e-15	86.75	85.5	0.133333		25	-3.47	100	73	97	77	86.75	78	93			85.5
603	R603W	0	0.471667	-0.345185	0.101071		0.625079	0.163142		6.25e-16	93	90	6.5		21.4286	-3.99	103	81	102	86	93	90				90
603	R603E	0	0.696667	0.040403	0.149286		0.612704	0.117048		6.25e-16	93	90	22.7		21.4286	-0.11	103	81	102	86	93	90				90
603	R603A	0	0.5175	0.0553728	0.110893		0.500239	0.044354		6.25e-16	93	90	9.7		21.4286	-2.6	103	81	102	86	93	90				90
603	R603K	0	0.0691667	0.0638652	0.0148214		0.213263	0.0253738		6.25e-16	93	90	17.7		21.4286	-0.12	103	81	102	86	93	90				90
603	R603I	0	0.856667	0.190213	0.183571		0.817183	0.0832813		6.25e-16	93	90	0.8		21.4286	-4.46	103	81	102	86	93	90				90
603	R603V	0	0.968333	0.299862	0.2075		0.890167	0.121451		6.25e-16	93	90	0.7		21.4286	-3.85	103	81	102	86	93	90				90
603	R603T	0	1.36333	0.32324	0.292143		0.62331	0.134367		6.25e-16	93	90	8.5		21.4286	-1.91	103	81	102	86	93	90				90
603	R603D	0	0.631667	0.179013	0.135357		0.890575	0.0723123		1.25e-15	93	90	17.85		21.4286	0.4	103	81	102	86	93	90				90
603	R603H	0	0.17	0.316985	0.0364286		0.423878	0.131782		1.25e-15	93	90	6.35		21.4286	-0.35	103	81	102	86	93	90				90
603	R603C	0	0.610833	0.327757	0.130893		0.270738	0.135227		1.25e-15	93	90	4.75		21.4286	-2.89	103	81	102	86	93	90				90
603	R603S	0	0.7525	0.365634	0.16125		0.189791	0.151078		1.25e-15	93	90	9.25		21.4286	-0.99	103	81	102	86	93	90				90
604	W604V	0	1.44333	-0.431512	0.20619		0.541216	0.245994		6.25e-16	88	61	16.1		14.2857	0.14	107	76		81	88	61				61
604	W604T	0	1.3975	-0.265564	0.199643		0.496298	0.181623		6.25e-16	88	61	-6.6		14.2857	2.08	107	76		81	88	61				61
604	W604E	0	1.87833	-0.209535	0.268333		1.32521	0.130788		6.25e-16	88	61	28		14.2857	3.88	107	76		81	88	61				61
604	W604K	0	1.5775	-0.208461	0.225357		1.45145	0.129184		6.25e-16	88	61	15.65		14.2857	3.87	107	76		81	88	61				61
604	W604M	0	0.473333	-0.0902786	0.067619		0.768485	0.228572		6.25e-16	88	61	9.5		14.2857	-0.44	107	76		81	88	61				61
604	W604Q	0	1.4075	-0.00128711	0.201071		0.974298	0.0493092		6.25e-16	88	61	21.8		14.2857	2.48	107	76		81	88	61				61
604	W604A	0	1.56083	0.192516	0.222976		0.842706	0.0527359		6.25e-16	88	61	3.2		14.2857	1.39	107	76		81	88	61				61
604	W604P	0	3.565	2.51898	0.509286		2.07613	1.04048		6.25e-16	88	61	-5.8		14.2857	0.69	107	76		81	88	61				61
604	W604F	0	1.28083	-0.660211	0.182976		0.577746	0.322347		1.25e-15	88	61	5.85		14.2857	-0.5	107	76		81	88	61				61
604	W604D	0	1.44083	-0.572531	0.205833		1.24959	0.278205		1.25e-15	88	61	11.35		14.2857	4.39	107	76		81	88	61				61
604	W604Y	0	1.56	-0.528571	0.222857		0.792522	0.248088		1.25e-15	88	61	1		14.2857	0.56	107	76		81	88	61				61
468	F468I	0	1.905	1.17114	1.905		1.33191	0.86068		2.5e-08	77.75	76	-1.2		100	0.03	83	68	92	68	77.75			61	91	76
468	F468C	1	2.41167	1.36933	2.41167		1.81284	0.574836		2.5e-08	77.75	76	-7		100	1.6	83	68	92	68	77.75			61	91	76
468	F468V	0	2.92333	1.67656	2.92333		1.79796	0.691168		2.5e-08	77.75	76	-6		100	0.64	83	68	92	68	77.75			61	91	76
468	F468Y	0	1.63333	1.73117	1.63333		1.29096	1.50893		2.5e-08	77.75	76	-4.9		100	1.06	83	68	92	68	77.75			61	91	76
468	F468S	1	2.7475	2.03236	2.7475		2.16848	0.655076		2.5e-08	77.75	76	-2.3		100	3.5	83	68	92	68	77.75			61	91	76
468	F468L	1	1.57	-0.381443	1.57		1.43383	0.716286		7.5e-08	77.75	76	-6.03333		100	0.03	83	68	92	68	77.75			61	91	76
485	L485M	0	0.619167	-0.48569	0.619167		0.297733	0.46983		2.5e-08	75.25	68.75	9.7		100	0.03	77	62	89	73	75.25	80	67	52	76	68.75
485	L485W	1	5.72167	0.780175	5.72167		1.74712	0.861001		2.5e-08	75.25	68.75	0.2		100	0.47	77	62	89	73	75.25	80	67	52	76	68.75
485	L485V	0	2.71333	1.15363	2.71333		0.283495	0.760676		2.5e-08	75.25	68.75	16.3		100	0.61	77	62	89	73	75.25	80	67	52	76	68.75
485	L485F	1	3.33333	0.692772	3.33333		1.28994	0.999541		5e-08	75.25	68.75	6.05		100	-0.03	77	62	89	73	75.25	80	67	52	76	68.75
487	V487M	0	-0.546667	-0.732796	-0.546667		0.167404	0.648385		2.5e-08	82.75	109.25	-6.6		100	-0.58	83	69	97	82	82.75	117	130	60	130	109.25
487	V487E	0	1.06583	-0.168411	1.06583		0.133038	0.686382		2.5e-08	82.75	109.25	11.9		100	3.74	83	69	97	82	82.75	117	130	60	130	109.25
487	V487A	1	0.833333	0.499747	0.833333		0.24692	0.481169		2.5e-08	82.75	109.25	-21.3		100	1.25	83	69	97	82	82.75	117	130	60	130	109.25
487	V487G	0	1.01667	0.777022	1.01667		0.544716	1.23144		2.5e-08	82.75	109.25	-12.5		100	2.17	83	69	97	82	82.75	117	130	60	130	109.25
487	V487L	1	-0.28	-0.194117	-0.28		0.210627	0.329843		5e-08	82.75	109.25	-2.45		100	-0.61	83	69	97	82	82.75	117	130	60	130	109.25
497	A497D	0	1.09917	0.197795	1.09917		0.105094	0.115762		2.5e-08	76.5	38.25	-2.5		100	3	80	67	84	75	76.5	30	37	40	46	38.25
497	A497S	0	0.576667	0.258481	0.576667		0.176343	0.122869		2.5e-08	76.5	38.25	-11.1		100	1.61	80	67	84	75	76.5	30	37	40	46	38.25
497	A497T	0	0.2775	0.414647	0.2775		0.543559	0.39785		2.5e-08	76.5	38.25	-9.3		100	0.69	80	67	84	75	76.5	30	37	40	46	38.25
497	A497V	0	0.699167	0.548557	0.699167		0.365027	0.70586		2.5e-08	76.5	38.25	-13.9		100	-1.25	80	67	84	75	76.5	30	37	40	46	38.25
497	A497G	0	1.1075	0.799186	1.1075		0.196844	0.337865		2.5e-08	76.5	38.25	-5.7		100	0.92	80	67	84	75	76.5	30	37	40	46	38.25
497	A497P	0	0.706667	3.17194	0.706667		0.628162	1.54513		2.5e-08	76.5	38.25	-8.5		100	-0.7	80	67	84	75	76.5	30	37	40	46	38.25
498	F498Y	0	2.33167	1.94518	2.33167		0.49339	0.854353		2.5e-08	74.25	46.25	-4.8		100	1.06	77	66	81	73	74.25	44	41	50	50	46.25
498	F498I	0	2.47417	2.72009	2.47417		0.518713	0.910337		2.5e-08	74.25	46.25	1		100	0.03	77	66	81	73	74.25	44	41	50	50	46.25
498	F498V	0	2.94667	3.01857	2.94667		0.170791	0.735543		2.5e-08	74.25	46.25	-5.8		100	0.64	77	66	81	73	74.25	44	41	50	50	46.25
498	F498C	0	5.06917	4.66667	5.06917		0.220844	1.11014		2.5e-08	74.25	46.25	-8.2		100	1.6	77	66	81	73	74.25	44	41	50	50	46.25
498	F498S	0	5.87667	5.60006	5.87667		0.563791	1.32672		2.5e-08	74.25	46.25	-3		100	3.5	77	66	81	73	74.25	44	41	50	50	46.25
498	F498L	0	1.73167	1.80805	1.73167		0.267576	0.58828		7.5e-08	74.25	46.25	-7.33333		100	0.03	77	66	81	73	74.25	44	41	50	50	46.25
525	L525M	0	-0.333333	0.109397	-0.333333		0.235037	0.424177		2.5e-08	60.25	48	-18		100	0.03	58	51	70	62	60.25	53	47	32	60	48
525	L525P	0	1.54417	1.50577	1.54417		0.373812	0.486962		2.5e-08	60.25	48	-33.3		100	1.16	58	51	70	62	60.25	53	47	32	60	48
525	L525Q	0	2.78667	2.35983	2.78667		0.217688	0.580552		2.5e-08	60.25	48	-5.7		100	2.95	58	51	70	62	60.25	53	47	32	60	48
525	L525V	0	1.98917	2.62583	1.98917		0.328923	0.851126		2.5e-08	60.25	48	-11.4		100	0.61	58	51	70	62	60.25	53	47	32	60	48
525	L525R	0	4.15417	2.7986	4.15417		0.668777	0.677974		2.5e-08	60.25	48	-28.4		100	4.46	58	51	70	62	60.25	53	47	32	60	48
597	L597R	18	3.22333	0.485138	2.64774		0.320719	0.675235		2.5e-08	68.75	37.75	-0.6		82.1429	4.46	77	58	78	62	68.75	27	34	30	60	37.75
597	L597Q	12	2.68667	0.697804	2.2069		0.0784316	0.175527		2.5e-08	68.75	37.75	4.9		82.1429	2.95	77	58	78	62	68.75	27	34	30	60	37.75
597	L597I	0	3.56833	1.14593	2.93113		0.789682	0.284848		2.5e-08	68.75	37.75	0.2		82.1429	0	77	58	78	62	68.75	27	34	30	60	37.75
597	L597V	10	3.405	1.40401	2.79696		1.31671	0.335605		2.5e-08	68.75	37.75	0.1		82.1429	0.61	77	58	78	62	68.75	27	34	30	60	37.75
597	L597P	1	2.55667	1.43344	2.10012		1.66805	1.18853		2.5e-08	68.75	37.75	9.8		82.1429	1.16	77	58	78	62	68.75	27	34	30	60	37.75
598	A598S	0	0.316667	0.392362	0.22619		0.439035	0.205139		2.5e-08	74.25	31.5	-4		71.4286	1.61	83	63	85	66	74.25	21	30	33	42	31.5
598	A598G	0	0.0391667	1.30901	0.0279762		0.293582	0.325781		2.5e-08	74.25	31.5	-7.8		71.4286	0.92	83	63	85	66	74.25	21	30	33	42	31.5
598	A598T	2	0.355	1.81706	0.253571		0.563891	1.06904		2.5e-08	74.25	31.5	-5.8		71.4286	0.69	83	63	85	66	74.25	21	30	33	42	31.5
598	A598V	4	0.464167	2.50643	0.331548		0.245374	1.12732		2.5e-08	74.25	31.5	-7.7		71.4286	-1.25	83	63	85	66	74.25	21	30	33	42	31.5
598	A598D	0	0.965	5.26029	0.689286		0.368991	1.80825		2.5e-08	74.25	31.5	3.7		71.4286	3	83	63	85	66	74.25	21	30	33	42	31.5
598	A598P	0	0.405833	5.85314	0.289881		0.685757	3.57351		2.5e-08	74.25	31.5	-1.3		71.4286	-0.7	83	63	85	66	74.25	21	30	33	42	31.5
599	T599I	4	-0.488333	-0.18664	-0.34881		0.198166	0.355139		2.5e-08	77	35.75	-7.7		71.4286	-2.55	87	66	88	67	77	26	40	35	42	35.75
599	T599K	0	-0.5675	0.0481208	-0.405357		0.107883	0.209597		2.5e-08	77	35.75	9.2		71.4286	1.79	87	66	88	67	77	26	40	35	42	35.75
599	T599A	0	-0.230833	0.18624	-0.164881		0.209435	0.150658		2.5e-08	77	35.75	1.2		71.4286	-0.69	87	66	88	67	77	26	40	35	42	35.75
599	T599S	0	0.2875	0.352975	0.205357		0.33194	0.298742		2.5e-08	77	35.75	-3.1		71.4286	0.92	87	66	88	67	77	26	40	35	42	35.75
599	T599P	0	0.223333	2.73115	0.159524		1.81425	0.729595		2.5e-08	77	35.75	1.9		71.4286	-1.39	87	66	88	67	77	26	40	35	42	35.75
600	V600M	25	-0.911667	-1.20305	-0.65119		1.67226	0.905263		2.5e-08	81	54	-6.6		71.4286	-0.58	92	69	92	71	81	32	43	66	75	54
600	V600E	35066	2.94	0.310006	2.1		2.24164	0.562068		2.5e-08	81	54	11.9	1.7	71.4286	3.74	92	69	92	71	81	32	43	66	75	54
600	V600A	12	0.538333	0.406176	0.384524		0.281226	0.698651		2.5e-08	81	54	-21.3		71.4286	1.25	92	69	92	71	81	32	43	66	75	54
600	V600G	12	1.96917	0.816566	1.40655		0.985536	0.793617		2.5e-08	81	54	-12.5		71.4286	2.17	92	69	92	71	81	32	43	66	75	54
600	V600L	9	-1.2925	-0.950604	-0.923214		1.4646	0.677073		5e-08	81	54	-2.45		71.4286	-0.61	92	69	92	71	81	32	43	66	75	54
601	K601I	1	0.4	-0.0644849	0.142857		0.310542	0.0766889		2.5e-08	84.25	70	-16.9		35.7143	-4.34	96	72	95	74	84.25	50	90			70
601	K601Q	0	0.288333	-0.0554339	0.102976		0.204265	0.0715853		2.5e-08	84.25	70	-12.2		35.7143	-1.39	96	72	95	74	84.25	50	90			70
601	K601E	121	0.930833	0.565881	0.33244		0.56004	0.205984		2.5e-08	84.25	70	5	1.7	35.7143	0.01	96	72	95	74	84.25	50	90			70
601	K601N	18	0.564167	0.881983	0.201488		0.175108	0.340311		5e-08	84.25	70	-5.9		35.7143	-0.88	96	72	95	74	84.25	50	90			70
602	S602T	0	1.28417	-0.00741791	0.321042		1.44073	0.0687653		2.5e-08	86.75	85.5	-1.8		25	-0.92	100	73	97	77	86.75	78	93			85.5
602	S602P	0	2.2925	0.318036	0.573125		2.05769	0.124355		2.5e-08	86.75	85.5	2.7		25	-2.31	100	73	97	77	86.75	78	93			85.5
602	S602C	0	0.7	0.765896	0.175		0.664885	0.31516		2.5e-08	86.75	85.5	-4.7		25	-1.9	100	73	97	77	86.75	78	93			85.5
602	S602A	0	0.316667	0.890663	0.0791667		0.28554	0.386319		2.5e-08	86.75	85.5	4		25	-1.61	100	73	97	77	86.75	78	93			85.5
602	S602F	0	0.6225	0.923133	0.155625		0.546162	0.374301		2.5e-08	86.75	85.5	2.3		25	-3.5	100	73	97	77	86.75	78	93			85.5
602	S602Y	0	0.916667	0.997273	0.229167		0.49966	0.412927		2.5e-08	86.75	85.5	-2.6		25	-2.44	100	73	97	77	86.75	78	93			85.5
603	R603P	0	4.60583	-0.791758	0.986964		2.3354	0.378982		2.5e-08	93	90	10.4		21.4286	-3.3	103	81	102	86	93	90				90
603	R603L	1	0.4075	-0.181794	0.0873214		0.498272	0.311977		2.5e-08	93	90	0.6		21.4286	-4.46	103	81	102	86	93	90				90
603	R603Q	0	0.271667	0.157097	0.0582143		0.426526	0.0630134		2.5e-08	93	90	5.5		21.4286	-1.51	103	81	102	86	93	90				90
603	R603G	0	0.700833	0.410296	0.150179		0.374177	0.169818		2.5e-08	93	90	10		21.4286	-1.68	103	81	102	86	93	90				90
604	W604L	0	0.769167	-0.506928	0.109881		0.447771	0.318981		2.5e-08	88	61	-0.2		14.2857	-0.47	107	76		81	88	61				61
604	W604S	0	1.44833	0.199665	0.206905		0.823615	0.0851098		2.5e-08	88	61	-8.3		14.2857	3	107	76		81	88	61				61
604	W604G	2	2.05	0.790833	0.292857		0.889382	0.318839		2.5e-08	88	61	3.6		14.2857	2.31	107	76		81	88	61				61
604	W604C	0	1.21417	0.135502	0.173452		0.979169	0.037856		5e-08	88	61	-1.75		14.2857	1.1	107	76		81	88	61				61
604	W604R	1	1.71417	0.264753	0.244881		1.27211	0.210221		5e-08	88	61	-1.15		14.2857	3.99	107	76		81	88	61				61
468	F468F	0	-0.0141667	0.00615093	-0.0141667		0.0331548	0.00960643		X	77.75	76	#VALUE!		100	0	83	68	92	68	77.75			61	91	76
485	L485L	0	-0.0616667	-0.0388032	-0.0616667		0.105126	0.097209		X	75.25	68.75	#VALUE!		100	0	77	62	89	73	75.25	80	67	52	76	68.75
487	V487V	0	0.0325	-0.00235419	0.0325		0.0471217	0.0216452		X	82.75	109.25	#VALUE!		100	0	83	69	97	82	82.75	117	130	60	130	109.25
497	A497A	0	0.00583333	0.00258824	0.00583333		0.0172986	0.00930033		X	76.5	38.25	#VALUE!		100	0	80	67	84	75	76.5	30	37	40	46	38.25
498	F498F	0	0.0408333	-0.00455082	0.0408333		0.214707	0.0322586		X	74.25	46.25	#VALUE!		100	0	77	66	81	73	74.25	44	41	50	50	46.25
525	L525L	0	0.0175	-0.00377638	0.0175		0.171683	0.0525313		X	60.25	48	#VALUE!		100	0	58	51	70	62	60.25	53	47	32	60	48
597	L597L	0	0.00416667	-0.00395874	0.00342262		0.00996205	0.0298467		X	68.75	37.75	#VALUE!		82.1429	0	77	58	78	62	68.75	27	34	30	60	37.75
598	A598A	0	0.0025	-0.000197246	0.00178571		0.00866025	0.0162153		X	74.25	31.5	#VALUE!		71.4286	0	83	63	85	66	74.25	21	30	33	42	31.5
599	T599T	0	0.0025	0.00154773	0.00178571		0.00452267	0.00774083		X	77	35.75	#VALUE!		71.4286	0	87	66	88	67	77	26	40	35	42	35.75
600	V600V	0	0.0025	-0.00363102	0.00178571		0.00866025	0.0152953		X	81	54	#VALUE!		71.4286	0	92	69	92	71	81	32	43	66	75	54
601	K601K	0	-0.0025	0.0913774	-0.000892857		0.0336087	0.0491737		X	84.25	70	#VALUE!		35.7143	0	96	72	95	74	84.25	50	90			70
602	S602S	0	0.000833333	0	0.000208333		0.00288675	0		X	86.75	85.5	#VALUE!		25	0	100	73	97	77	86.75	78	93			85.5
603	R603R	0	-0.0191667	0.00273151	-0.00410714		0.264213	0.0640872		X	93	90	#VALUE!		21.4286	0	103	81	102	86	93	90				90
604	W604W	0	0.0691667	-0.0149359	0.00988095		0.0882618	0.0299612		X	88	61	#VALUE!		14.2857	0	107	76		81	88	61				61

## Sheet: input random forest
Supplementary file 1. Summary of structure-energy and statistical properties of mutations in the hydrophobic pocket of BRAF and parameters used for random forest analyses.
Supplementary file 1 - sheet 2. Parameters and values used for random forest analyses.
		Parameter 1	Parameter 2	Parameter 3	Parameter 4	Parameter 5	Parameter 6	Parameter 7
Mutation	Cancer frequency	Destabilization of inactive conformation and/or folding (DDG BRAF_inactive)	Destabilization of active conformation (folding) (DDG BRAF_active)	Destabilization of inactive loop conformation (DDG BRAF_inactive_loop)	Nucleotide substitution frequency	Change in codon usage frequency	Salt brigde	Change in hydrophobic solvation energy (DDG BRAF hydr_solv_energy)
F468K	0	3.19833	0.77716		3.125e-23	11.55		4.37
F468Q	0	2.59833	1.25666		3.125e-23	6.3		2.98
F468E	0	3.06167	1.78447		3.125e-23	18		4.38
F468P	0	2.48	1.43383		6.25e-23	-1.65		1.19
F468M	0	0.580833	-0.367023		6.25e-16	5.4		0.06
F468R	0	3.0525	0.607336		6.25e-16	-12.2		4.49
F468H	0	2.655	1.28151		6.25e-16	-6.5		4.14
F468N	0	2.54917	1.44569		6.25e-16	-0.2		3.49
F468A	0	2.3625	1.79791		6.25e-16	1.7		1.89
F468D	0	3.02417	1.99319		6.25e-16	5.4		4.89
F468W	0	3.25667	2.0989		6.25e-16	-4.1		0.5
F468G	0	2.63667	2.20097		6.25e-16	-6.1		2.81
F468T	0	3.2825	2.36171		6.25e-16	-4.1		2.58
F468I	0	1.905	1.17114		2.5e-08	-1.2		0.03
F468C	1	2.41167	1.36933		2.5e-08	-7		1.6
F468V	0	2.92333	1.67656		2.5e-08	-6		0.64
F468Y	0	1.63333	1.73117		2.5e-08	-4.9		1.06
F468S	1	2.7475	2.03236		2.5e-08	-2.3		3.5
F468L	1	1.57	-0.381443		7.5e-08	-6.03333		0.03
L485N	0	4.13333	1.74063		3.125e-23	5.5		3.46
L485C	0	3.6825	1.77838		3.125e-23	-1.55		1.57
L485D	0	4.6775	2.14078		3.125e-23	11.55		4.86
L485H	0	4.89583	3.15063		3.125e-23	0.05		4.11
L485K	0	3.88667	1.39759		6.25e-16	20.3		4.34
L485T	0	3.96333	1.76551		6.25e-16	-6.4		2.55
L485A	0	3.515	1.79835		6.25e-16	-5		1.86
L485E	0	4.3175	1.86955		6.25e-16	28.2		4.35
L485G	0	4.79583	2.48643		6.25e-16	3.8		2.78
L485P	0	5.33583	3.05336		6.25e-16	-5.6		1.16
L485Y	0	6.505	1.45049		1.25e-15	1.2		1.03
L485Q	0	3.27833	1.53872		1.25e-15	10.6		2.95
L485R	0	4.295	1.94156		1.25e-15	-0.95		4.46
L485I	0	1.78833	0.167823		1.875e-15	2.13333		0
L485S	1	4.58	2.01909		2.5e-15	-0.55		3.47
L485M	0	0.619167	-0.48569		2.5e-08	9.7		0.03
L485W	1	5.72167	0.780175		2.5e-08	0.2		0.47
L485V	0	2.71333	1.15363		2.5e-08	16.3		0.61
L485F	1	3.33333	0.692772		5e-08	6.05		-0.03
V487N	0	0.0758333	-0.48722		3.125e-23	-10.8		2.85
V487Y	0	-0.045	-0.0271041		3.125e-23	-15.1		0.42
V487C	0	0.493333	0.175493		3.125e-23	-17.85		0.96
V487H	0	0.8725	0.33126		3.125e-23	-16.25		3.5
V487K	0	0.515833	-0.266573		6.25e-16	4		3.73
V487T	0	1.11667	-0.0138284		6.25e-16	-22.7		1.94
V487W	0	0.405	0.277923		6.25e-16	-16.1		-0.14
V487S	0	1.0875	0.460057		6.25e-16	-24.4		2.86
V487P	0	1.7525	3.85489		6.25e-16	-21.9		0.55
V487D	0	0.704167	-0.590844		1.25e-15	-4.75		4.25
V487F	0	-0.125833	-0.163723		1.25e-15	-10.25		-0.64
V487R	0	1.03083	0.0152236		1.25e-15	-17.25		3.85
V487Q	0	0.569167	0.0585149		1.25e-15	-5.7		2.34
V487I	0	-0.318333	-0.352413		1.875e-15	-14.1667		-0.61
V487M	0	-0.546667	-0.732796		2.5e-08	-6.6		-0.58
V487E	0	1.06583	-0.168411		2.5e-08	11.9		3.74
V487A	1	0.833333	0.499747		2.5e-08	-21.3		1.25
V487G	0	1.01667	0.777022		2.5e-08	-12.5		2.17
V487L	1	-0.28	-0.194117		5e-08	-2.45		-0.61
A497M	0	-0.536667	-0.831289		1.5625e-23	-6.2		-1.83
A497W	0	0.296667	-0.441757		1.5625e-23	-15.7		-1.39
A497K	0	-0.153333	-0.254546		3.125e-23	-0.05		2.48
A497Q	0	0.3075	-0.159688		3.125e-23	-5.3		1.09
A497F	0	0.275	-0.736417		6.25e-16	-8.1		-1.89
A497Y	0	0.5075	-0.73433		6.25e-16	-12.9		-0.83
A497L	0	-0.708333	-0.706795		6.25e-16	-9.1		-1.86
A497R	0	0.2325	-0.409217		6.25e-16	-17.6		2.6
A497N	0	0.3425	0.0634798		6.25e-16	-9		1.6
A497H	0	0.764167	0.10258		6.25e-16	-13.6		2.25
A497I	0	0.3625	0.284822		6.25e-16	-7.1		-1.86
A497C	0	0.755	0.400678		6.25e-16	-16.3		-0.29
A497E	0	0.665833	-0.301278		1.25e-15	6.4		2.49
A497D	0	1.09917	0.197795		2.5e-08	-2.5		3
A497S	0	0.576667	0.258481		2.5e-08	-11.1		1.61
A497T	0	0.2775	0.414647		2.5e-08	-9.3		0.69
A497V	0	0.699167	0.548557		2.5e-08	-13.9		-1.25
A497G	0	1.1075	0.799186		2.5e-08	-5.7		0.92
A497P	0	0.706667	3.17194		2.5e-08	-8.5		-0.7
F498K	0	4.645	3.72646		3.125e-23	8.05		4.37
F498Q	0	3.94	4.37977		3.125e-23	2.8		2.98
F498E	0	5.9225	4.89743		3.125e-23	14.5		4.38
F498M	0	1.345	1.55088		6.25e-16	1.9		0.06
F498W	0	4.42167	1.81279		6.25e-16	-7.6		0.5
F498H	0	3.78167	3.24435		6.25e-16	-5.5		4.14
F498R	0	5.08917	3.557		6.25e-16	-9.5		4.49
F498A	0	4.915	4.29981		6.25e-16	8.1		1.89
F498T	0	4.5975	4.65576		6.25e-16	-1.2		2.58
F498N	0	5.58	4.76045		6.25e-16	-0.9		3.49
F498G	0	6.25083	5.37974		6.25e-16	2.4		2.81
F498D	0	6.575	5.68264		6.25e-16	5.6		4.89
F498P	0	8.06417	7.34068		6.25e-16	-0.4		1.19
F498Y	0	2.33167	1.94518		2.5e-08	-4.8		1.06
F498I	0	2.47417	2.72009		2.5e-08	1		0.03
F498V	0	2.94667	3.01857		2.5e-08	-5.8		0.64
F498C	0	5.06917	4.66667		2.5e-08	-8.2		1.6
F498S	0	5.87667	5.60006		2.5e-08	-3		3.5
F498L	0	1.73167	1.80805		7.5e-08	-7.33333		0.03
L525Y	0	3.14917	1.40199		3.125e-23	-26.5		1.03
L525N	0	2.6025	2.20398		3.125e-23	-22.2		3.46
L525C	0	2.97	2.37353		3.125e-23	-29.25		1.57
L525D	0	4.3025	3.65827		3.125e-23	-16.15		4.86
L525K	0	3.22083	2.46132		6.25e-16	-7.4		4.34
L525E	0	3.46	2.96815		6.25e-16	0.5		4.35
L525A	0	3.125	3.00758		6.25e-16	-32.7		1.86
L525S	0	3.62417	3.40546		6.25e-16	-35.8		3.47
L525T	0	3.52917	3.45848		6.25e-16	-34.1		2.55
L525W	0	5.30833	3.73624		6.25e-16	-27.5		0.47
L525G	0	5.06417	4.40473		6.25e-16	-23.9		2.78
L525F	0	0.903333	0.396481		1.25e-15	-21.65		-0.03
L525H	0	2.8525	2.08803		1.25e-15	-27.65		4.11
L525I	0	1.995	2.03104		1.875e-15	-25.5667		0
L525M	0	-0.333333	0.109397		2.5e-08	-18		0.03
L525P	0	1.54417	1.50577		2.5e-08	-33.3		1.16
L525Q	0	2.78667	2.35983		2.5e-08	-5.7		2.95
L525V	0	1.98917	2.62583		2.5e-08	-11.4		0.61
L525R	0	4.15417	2.7986		2.5e-08	-28.4		4.46
L597W	0		0.68747	3.47807	1.5625e-23	5.9		0.47
L597Y	0		0.207037	2.27193	3.125e-23	6.9		1.03
L597N	0		0.755034	2.05015	3.125e-23	11.2		3.46
L597D	0		0.922325	3.1406	3.125e-23	17.25		4.86
L597C	0		1.02551	2.00771	3.125e-23	4.15		1.57
L597K	0		0.210855	2.56765	6.25e-16	17.1		4.34
L597M	0		0.296069	-0.0821429	6.25e-16	15.4		0.03
L597E	0		0.909607	2.54232	6.25e-16	22.1		4.35
L597A	0		0.918933	2.64842	6.25e-16	9.1		1.86
L597G	0		1.09326	1.87902	6.25e-16	9.4		2.78
L597S	13		1.13365	2.88185	6.25e-16	4.8		3.47
L597T	0		1.32054	3.41988	6.25e-16	7.9		2.55
L597F	0		0.0168218	0.259435	1.25e-15	11.75		-0.03
L597H	0		1.08809	1.98512	1.25e-15	5.75		4.11
L597R	18		0.485138	2.64774	2.5e-08	-0.6		4.46
L597Q	12		0.697804	2.2069	2.5e-08	4.9		2.95
L597I	0		1.14593	2.93113	2.5e-08	0.2		0
L597V	10		1.40401	2.79696	2.5e-08	0.1		0.61
L597P	1		1.43344	2.10012	2.5e-08	9.8		1.16
A598M	0		4.87746	-0.0744048	1.5625e-23	3.7		-1.83
A598W	0		32.8417	1.17619	1.5625e-23	-5.8		-1.39
A598Q	0		7.967	0.177976	3.125e-23	4.6		1.09
A598K	0		10.0552	-0.022619	3.125e-23	9.85		2.48
A598C	0		1.16049	0.126786	6.25e-16	-8.7		-0.29
A598I	0		4.65637	0.0107143	6.25e-16	-2.9		-1.86
A598N	0		4.76891	0.305357	6.25e-16	-1.9		1.6
A598L	0		6.0507	-0.169048	6.25e-16	-5.8		-1.86
A598R	0		14.6272	-0.0410714	6.25e-16	-13.9		2.6
A598H	0		16.1097	0.655952	6.25e-16	-8.2		2.25
A598F	0		20.9966	0.0755952	6.25e-16	-1.7		-1.89
A598Y	0		25.4385	0.358333	6.25e-16	-6.6		-0.83
A598E	0		9.47489	0.634524	1.25e-15	16.3		2.49
A598S	0		0.392362	0.22619	2.5e-08	-4		1.61
A598G	0		1.30901	0.0279762	2.5e-08	-7.8		0.92
A598T	2		1.81706	0.253571	2.5e-08	-5.8		0.69
A598V	4		2.50643	0.331548	2.5e-08	-7.7		-1.25
A598D	0		5.26029	0.689286	2.5e-08	3.7		3
A598P	0		5.85314	0.289881	2.5e-08	-1.3		-0.7
T599W	0		0.440565	-0.0202381	1.5625e-23	-2		-2.08
T599C	0		-0.0801975	0.254167	3.125e-23	-3.75		-0.98
T599D	0		0.29848	0.589286	3.125e-23	9.35	1.7	2.31
T599F	0		0.417066	-0.217857	3.125e-23	3.85		-2.58
T599Y	0		0.499359	-0.154167	3.125e-23	-1		-1.52
T599N	0		0.550621	-0.485119	3.125e-23	3.3		0.91
T599H	0		0.747489	-0.369643	3.125e-23	-2.15		1.56
T599M	0		-0.777314	-0.747619	6.25e-16	7.5		-2.52
T599V	0		0.122141	-0.0452381	6.25e-16	-7.8		-1.94
T599E	0		0.220994	0.111905	6.25e-16	14.2	1.7	1.8
T599G	0		0.523632	0.17381	6.25e-16	1.5		0.23
T599Q	0		0.187405	-0.530952	1.25e-15	8.4		0.4
T599R	0		0.467433	-0.668452	1.25e-15	-5.9		1.91
T599L	0		0.604961	-0.652381	1.25e-15	-7.75		-2.55
T599I	4		-0.18664	-0.34881	2.5e-08	-7.7		-2.55
T599K	0		0.0481208	-0.405357	2.5e-08	9.2		1.79
T599A	0		0.18624	-0.164881	2.5e-08	1.2		-0.69
T599S	0		0.352975	0.205357	2.5e-08	-3.1		0.92
T599P	0		2.73115	0.159524	2.5e-08	1.9		-1.39
V600C	0		-0.0932668	0.607143	3.125e-23	-17.85		0.96
V600Y	0		-0.0507664	8.1994	3.125e-23	-15.1		0.42
V600N	0		0.355266	1.12262	3.125e-23	-10.8		2.85
V600H	0		0.613584	4.62202	3.125e-23	-16.25		3.5
V600K	471		-0.157507	1.51488	6.25e-16	4		3.73
V600P	0		0.0186794	1.02619	6.25e-16	-21.9		0.55
V600T	0		0.0950929	0.745238	6.25e-16	-22.7		1.94
V600W	0		0.186347	4.08929	6.25e-16	-16.1		-0.14
V600S	0		0.678104	1.16667	6.25e-16	-24.4		2.86
V600D	18		0.517271	2.01012	1.25e-15	-4.75		4.25
V600F	0		-0.0869738	5.30179	1.25e-15	-10.25		-0.64
V600R	73		0.115379	1.9625	1.25e-15	-17.25		3.85
V600Q	0		0.150662	1.04405	1.25e-15	-5.7		2.34
V600I	0		-0.492878	0.205952	1.875e-15	-14.1667		-0.61
V600M	25		-1.20305	-0.65119	2.5e-08	-6.6		-0.58
V600E	35066		0.310006	2.1	2.5e-08	11.9		3.74
V600A	12		0.406176	0.384524	2.5e-08	-21.3		1.25
V600G	12		0.816566	1.40655	2.5e-08	-12.5		2.17
V600L	9		-0.950604	-0.923214	5e-08	-2.45		-0.61
K601W	0		-0.364897	0.0565476	1.5625e-23	-11.2		-3.87
K601F	0		0.111686	0.285417	3.125e-23	-5.35		-4.37
K601C	0		0.59217	0.370536	3.125e-23	-12.95		-2.77
K601M	0		-0.503328	-0.0925595	6.25e-16	-1.7		-4.31
K601V	0		0.68941	0.280952	6.25e-16	-17		-3.73
K601A	0		0.811379	0.213095	6.25e-16	-8		-2.48
K601P	0		1.10298	1.55417	6.25e-16	-7.3		-3.18
K601T	0		1.16915	0.188095	6.25e-16	-9.2		-1.79
K601G	0		1.27553	0.46369	6.25e-16	-7.7		-1.56
K601L	0		-0.293252	-0.0428571	1.25e-15	-16.95		-4.34
K601R	1		0.216553	0.0547619	1.25e-15	-15.1		0.12
K601Y	0		0.589285	0.252976	1.25e-15	-10.2		-3.31
K601D	0		0.805667	0.645238	1.25e-15	0.15	1.7	0.52
K601H	0		1.1417	0.370238	1.25e-15	-11.35		-0.23
K601S	0		1.05556	0.300298	1.875e-15	-9.66667		-0.87
K601I	1		-0.0644849	0.142857	2.5e-08	-16.9		-4.34
K601Q	0		-0.0554339	0.102976	2.5e-08	-12.2		-1.39
K601E	121		0.565881	0.33244	2.5e-08	5	1.7	0.01
K601N	18		0.881983	0.201488	5e-08	-5.9		-0.88
S602M	0		1.11082	0.140625	1.5625e-23	7.7		-3.44
S602E	0		0.503421	0.163125	3.125e-23	20.3	1.7	0.88
S602Q	0		1.1378	-0.00333333	3.125e-23	8.6		-0.52
S602K	0		1.2901	0.227917	3.125e-23	13.85		0.87
S602D	0		0.326178	0.202917	6.25e-16	7.7	1.7	1.39
S602N	0		0.887737	0.000416667	6.25e-16	2.1		-0.01
S602H	0		0.998534	0.202917	6.25e-16	-4.2		0.64
S602W	0		1.11513	0.233125	6.25e-16	-1.8		-3
S602R	0		1.21293	0.122917	6.25e-16	-9.9		0.99
S602G	0		1.36641	0.10375	6.25e-16	-3.8		-0.69
S602V	0		1.42787	0.295625	6.25e-16	-3.7		-2.86
S602L	0		0.973741	0.0725	1.875e-15	-3.73333		-3.47
S602I	0		1.10417	0.341667	1.875e-15	0.133333		-3.47
S602T	0		-0.00741791	0.321042	2.5e-08	-1.8		-0.92
S602P	0		0.318036	0.573125	2.5e-08	2.7		-2.31
S602C	0		0.765896	0.175	2.5e-08	-4.7		-1.9
S602A	0		0.890663	0.0791667	2.5e-08	4		-1.61
S602F	0		0.923133	0.155625	2.5e-08	2.3		-3.5
S602Y	0		0.997273	0.229167	2.5e-08	-2.6		-2.44
R603M	0		-0.0537845	0.0269643	1.5625e-23	16		-4.43
R603F	0		-0.250298	0.101607	3.125e-23	12.35		-4.49
R603Y	0		-0.187266	0.112857	3.125e-23	7.5		-3.43
R603N	0		0.297193	0.0194643	3.125e-23	11.8		-1
R603W	0		-0.345185	0.101071	6.25e-16	6.5		-3.99
R603E	0		0.040403	0.149286	6.25e-16	22.7		-0.11
R603A	0		0.0553728	0.110893	6.25e-16	9.7		-2.6
R603K	0		0.0638652	0.0148214	6.25e-16	17.7		-0.12
R603I	0		0.190213	0.183571	6.25e-16	0.8		-4.46
R603V	0		0.299862	0.2075	6.25e-16	0.7		-3.85
R603T	0		0.32324	0.292143	6.25e-16	8.5		-1.91
R603D	0		0.179013	0.135357	1.25e-15	17.85		0.4
R603H	0		0.316985	0.0364286	1.25e-15	6.35		-0.35
R603C	0		0.327757	0.130893	1.25e-15	4.75		-2.89
R603S	0		0.365634	0.16125	1.25e-15	9.25		-0.99
R603P	0		-0.791758	0.986964	2.5e-08	10.4		-3.3
R603L	1		-0.181794	0.0873214	2.5e-08	0.6		-4.46
R603Q	0		0.157097	0.0582143	2.5e-08	5.5		-1.51
R603G	0		0.410296	0.150179	2.5e-08	10		-1.68
W604N	0		-0.261126	0.208929	1.5625e-23	5.3		2.99
W604H	0		0.342249	0.262976	3.125e-23	-0.15		3.64
W604I	0		-0.726373	0.117143	4.688e-23	1.93333		-0.47
W604V	0		-0.431512	0.20619	6.25e-16	16.1		0.14
W604T	0		-0.265564	0.199643	6.25e-16	-6.6		2.08
W604E	0		-0.209535	0.268333	6.25e-16	28		3.88
W604K	0		-0.208461	0.225357	6.25e-16	15.65		3.87
W604M	0		-0.0902786	0.067619	6.25e-16	9.5		-0.44
W604Q	0		-0.00128711	0.201071	6.25e-16	21.8		2.48
W604A	0		0.192516	0.222976	6.25e-16	3.2		1.39
W604P	0		2.51898	0.509286	6.25e-16	-5.8		0.69
W604F	0		-0.660211	0.182976	1.25e-15	5.85		-0.5
W604D	0		-0.572531	0.205833	1.25e-15	11.35		4.39
W604Y	0		-0.528571	0.222857	1.25e-15	1		0.56
W604L	0		-0.506928	0.109881	2.5e-08	-0.2		-0.47
W604S	0		0.199665	0.206905	2.5e-08	-8.3		3
W604G	2		0.790833	0.292857	2.5e-08	3.6		2.31
W604C	0		0.135502	0.173452	5e-08	-1.75		1.1
W604R	1		0.264753	0.244881	5e-08	-1.15		3.99
