# Supplementary figures and images for: The yin–yang of kinase activation and unfolding explains the peculiarity of Val600 in the activation segment of BRAF
Source: eLife journal article supplement (doi:10.7554/elife.12814), 2016-01-08

**Figure 1-figure supplement 1 – Kiel *et al.***

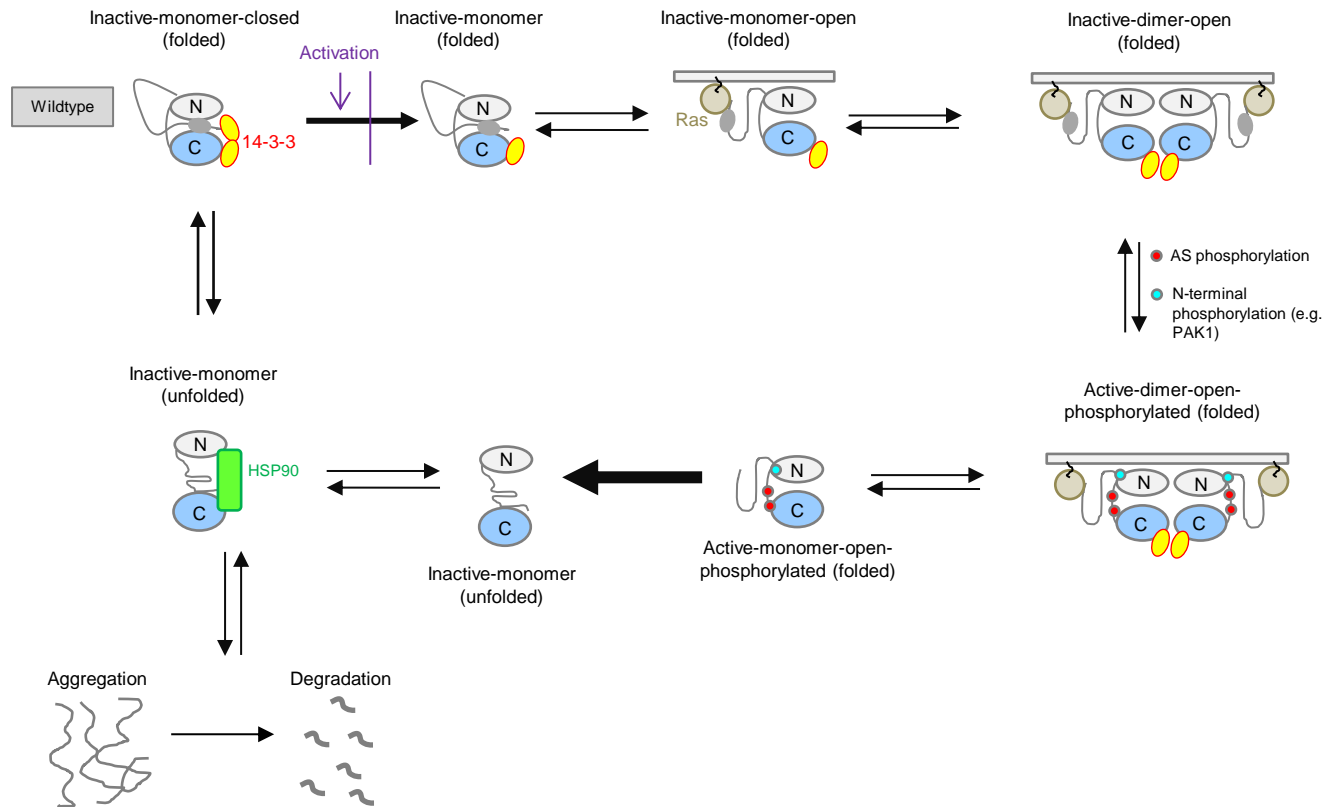

Supplement: supp [file elife-12814-supp-v1.zip]

**Figure 4-figure supplement 2 – Kiel *et al.***

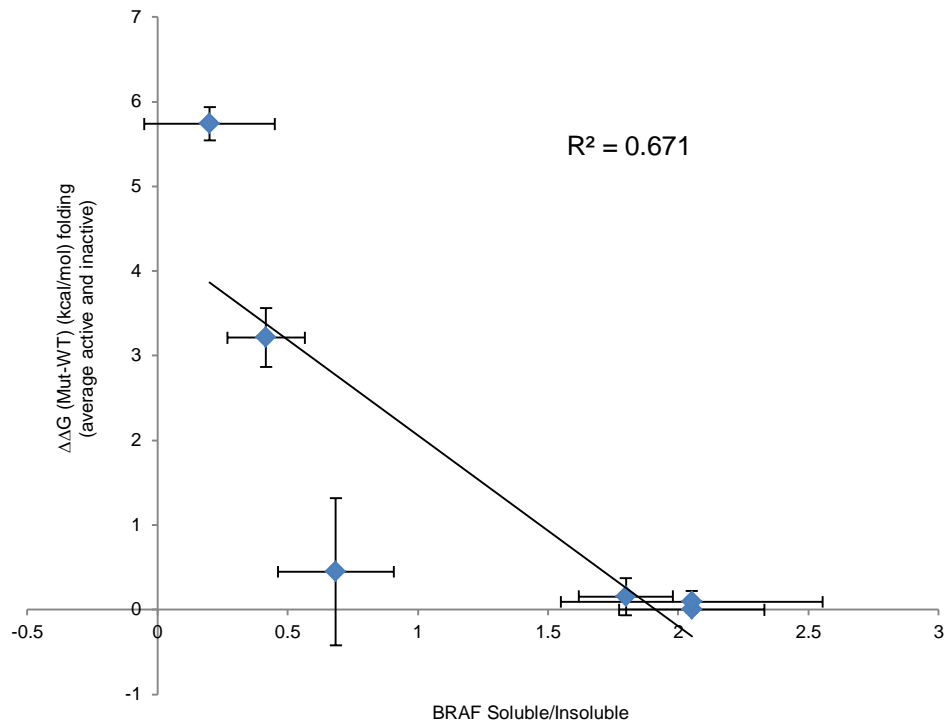

Supplement: supp [file elife-12814-supp-v1.zip › elife_poa_e12814_Figure_4_figure_supplement_2.pdf]

**Figure 3-figure supplement 1 – Kiel *et al.***

**A**

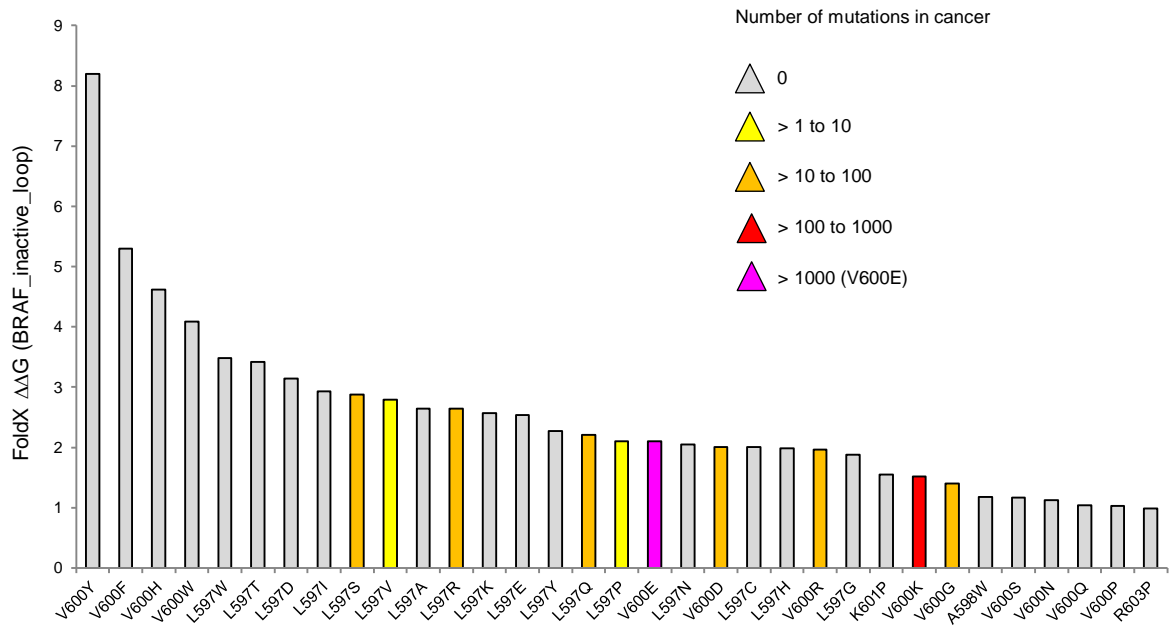

**B**

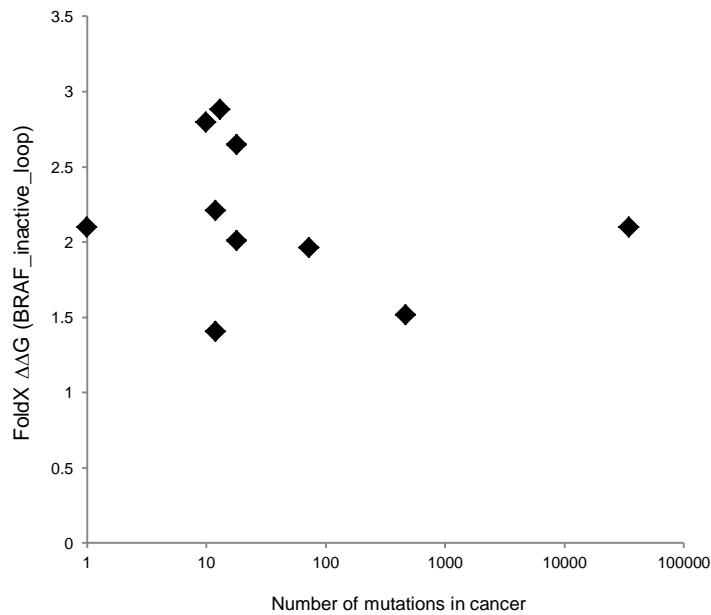

Supplement: supp [file elife-12814-supp-v1.zip › elife_poa_e12814_Figure_3_figure_supplement_1.pdf]

Figure 4-figure supplement 4 – Kiel *et al.*

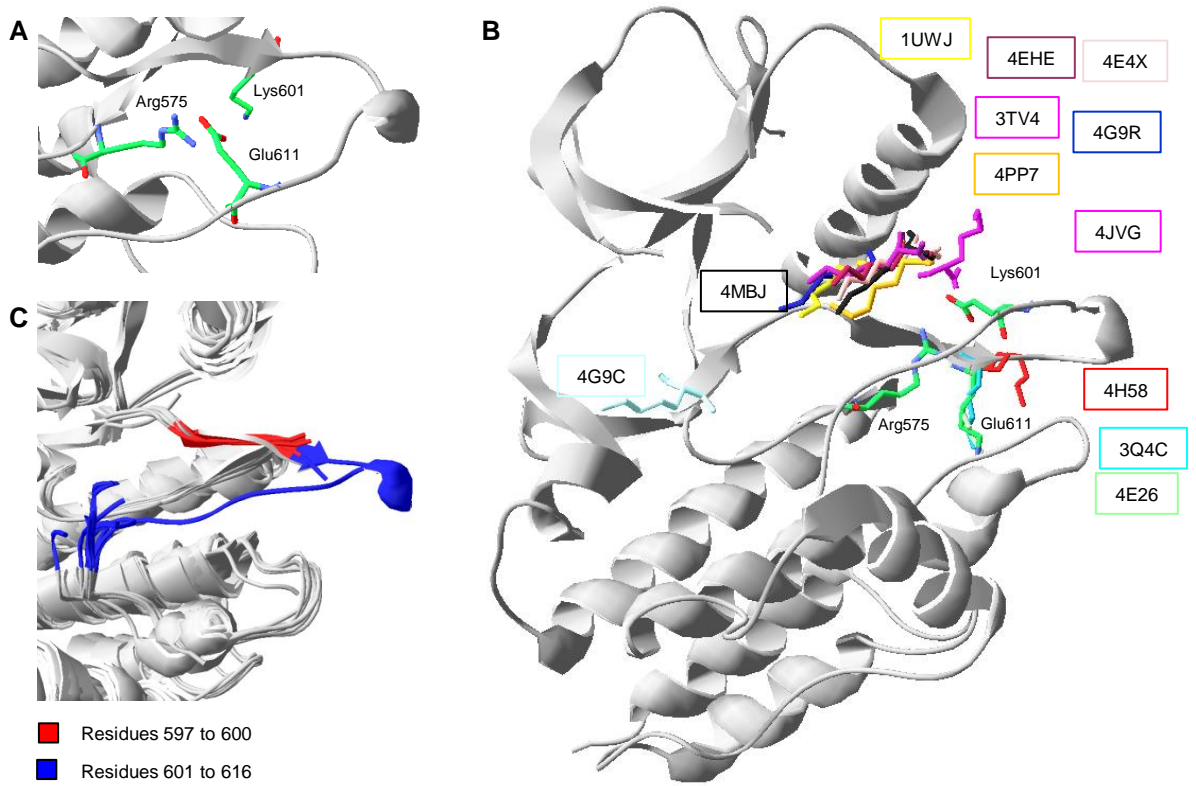

Supplement: supp [file elife-12814-supp-v1.zip › elife_poa_e12814_Figure_4_figure_supplement_4.pdf]

**Figure 4-figure supplement 6 – Kiel *et al.***

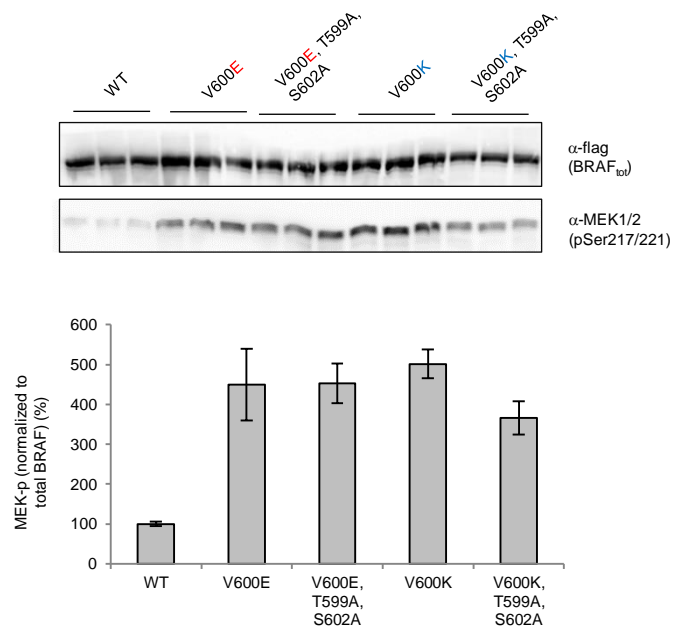

Supplement: supp [file elife-12814-supp-v1.zip › elife_poa_e12814_Figure_4_figure_supplement_6.pdf]

**Figure 3-figure supplement 3 – Kiel *et al.***

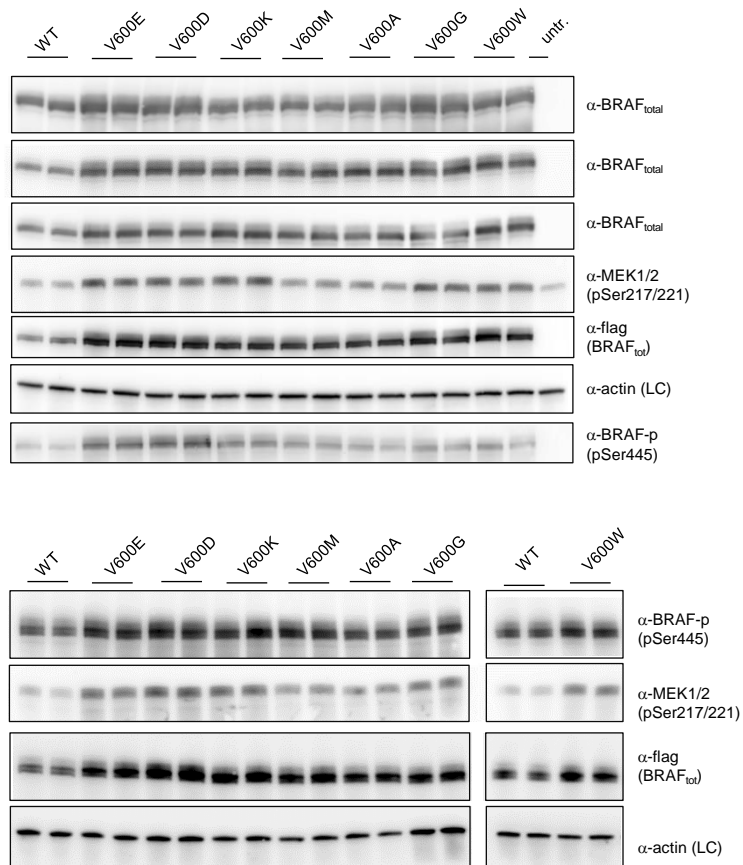

Supplement: supp [file elife-12814-supp-v1.zip › elife_poa_e12814_Figure_3_figure_supplement_3.pdf]

Figure 3-figure supplement 2 – Kiel *et al.*

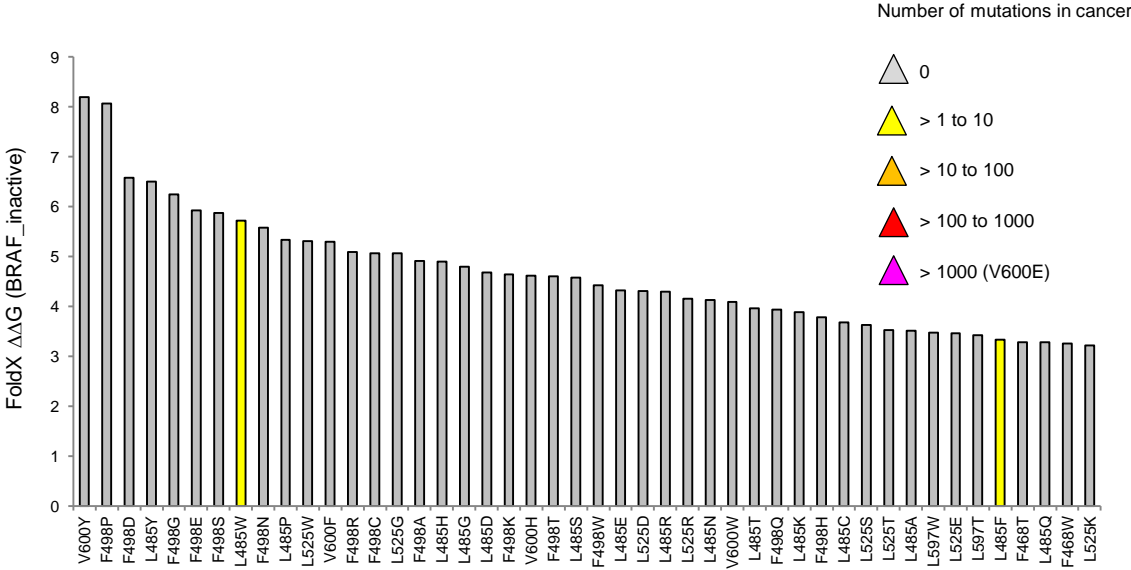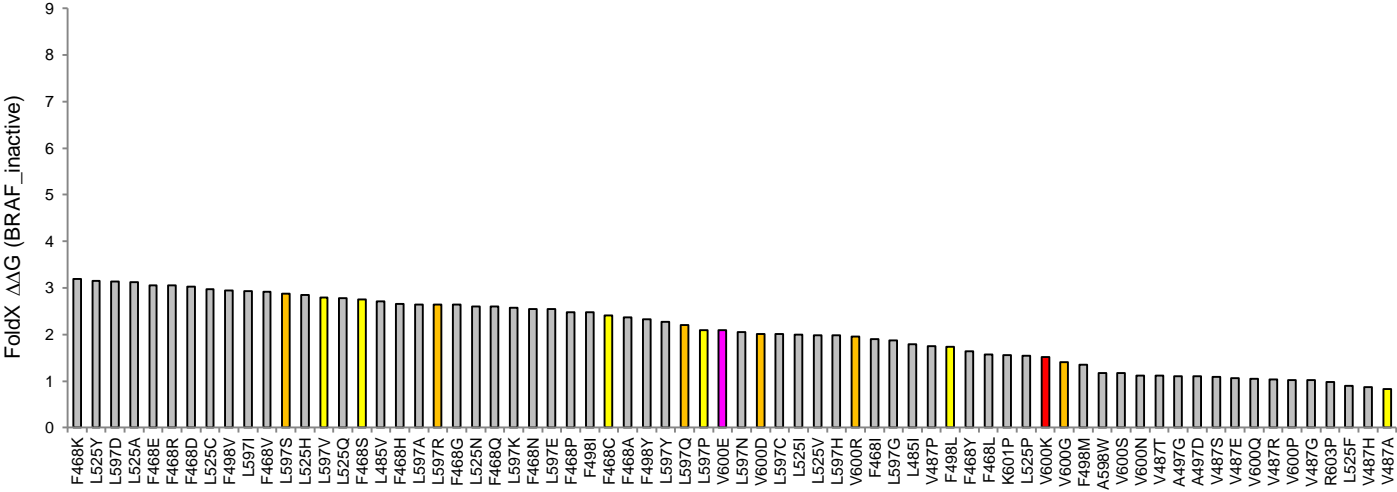

Supplement: supp [file elife-12814-supp-v1.zip › elife_poa_e12814_Figure_3_figure_supplement_2.pdf]

**Figure 5-figure supplement 1 – Kiel *et al.***

**A**

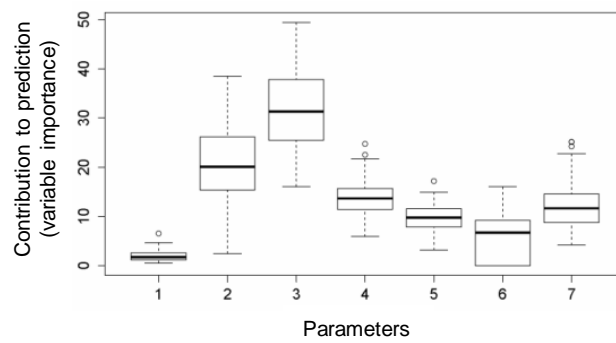

**B**

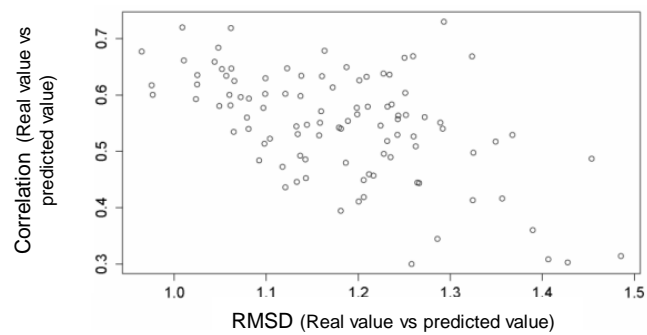

Supplement: supp [file elife-12814-supp-v1.zip › elife_poa_e12814_Figure_5_figure_supplement_1.pdf]

**Figure 4-figure supplement 1 Kiel *et al.***

**A**

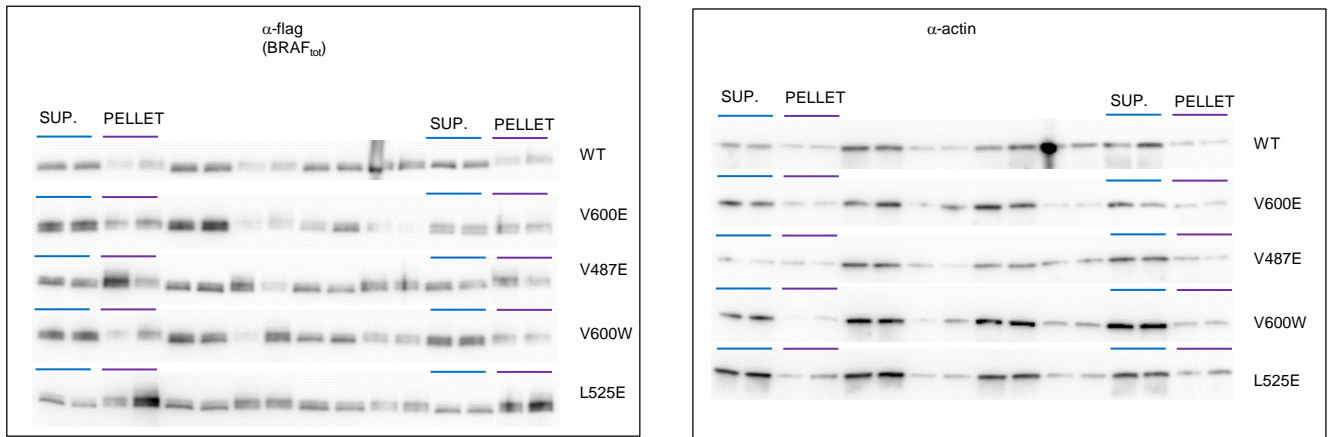

**B**

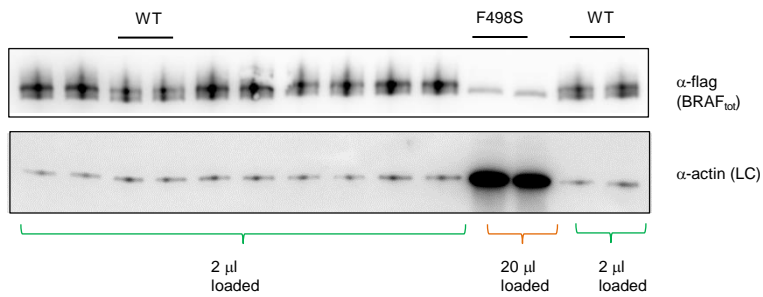

Supplement: supp [file elife-12814-supp-v1.zip › elife_poa_e12814_Figure_4_figure_supplement_1.pdf]

**Figure 4-figure supplement 5 – Kiel *et al.***

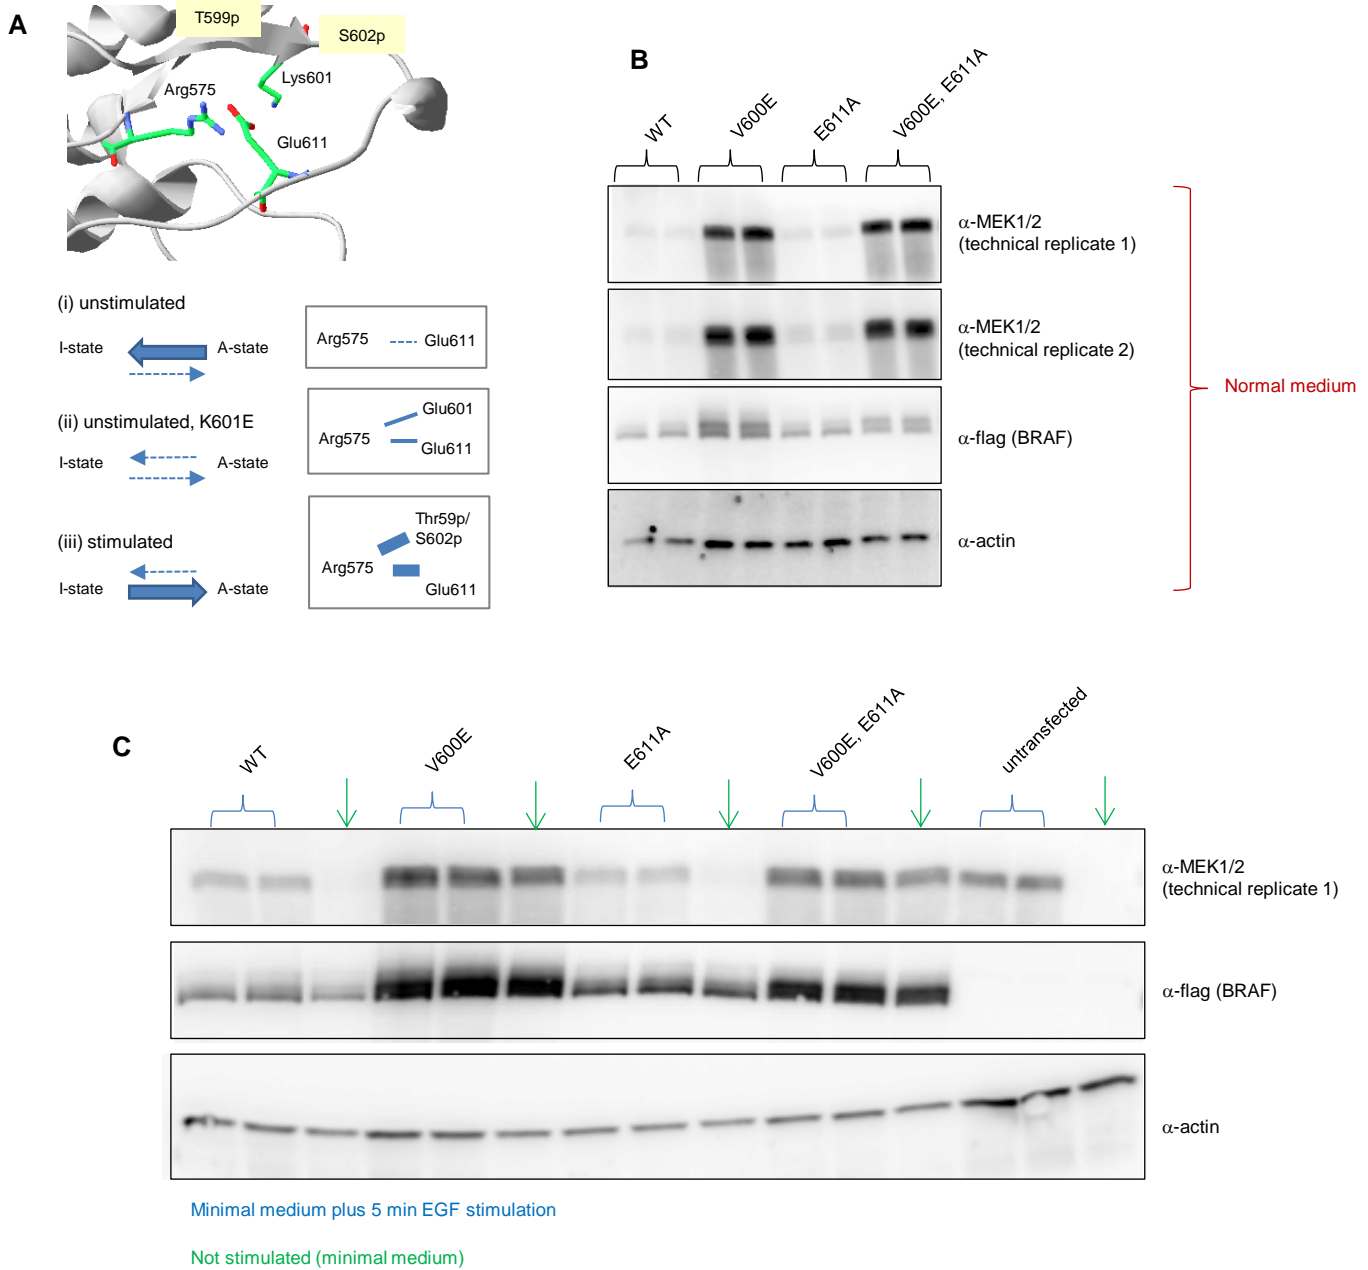

Supplement: supp [file elife-12814-supp-v1.zip › elife_poa_e12814_Figure_4_figure_supplement_5.pdf]

**Figure 3-figure supplement 4 – Kiel *et al.***

**A**

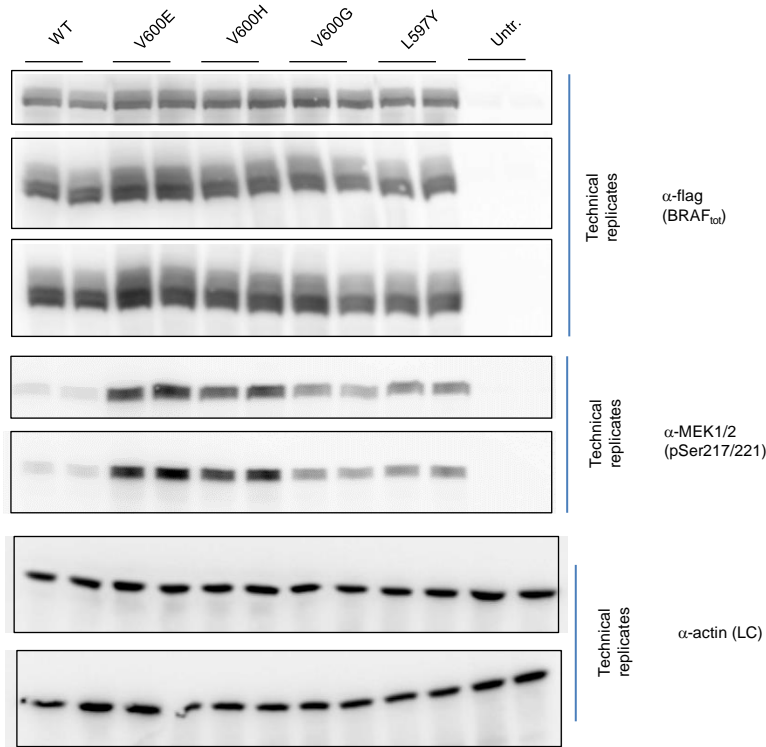

**B**

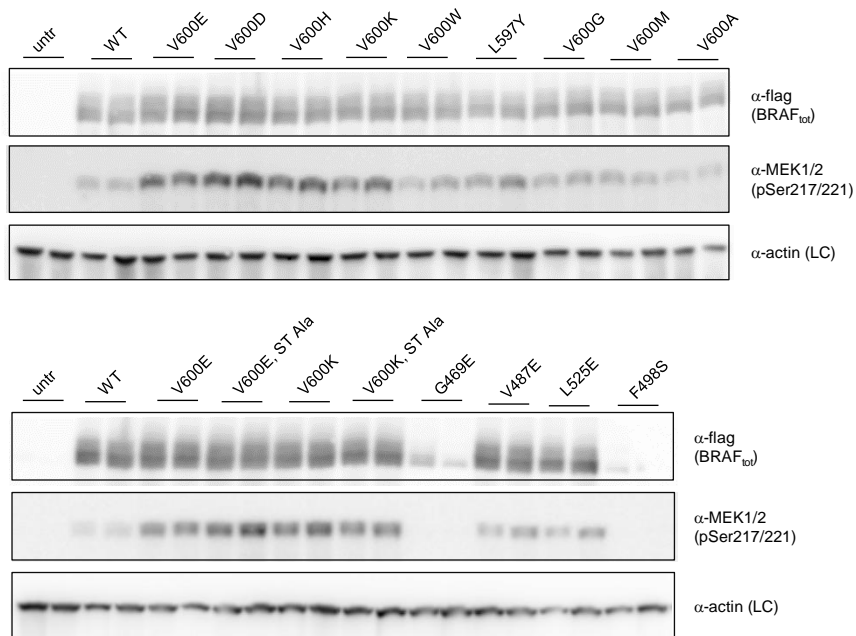

Supplement: supp [file elife-12814-supp-v1.zip › elife_poa_e12814_Figure_3_figure_supplement_4.pdf]

**Figure 4-figure supplement 3 – Kiel *et al.***

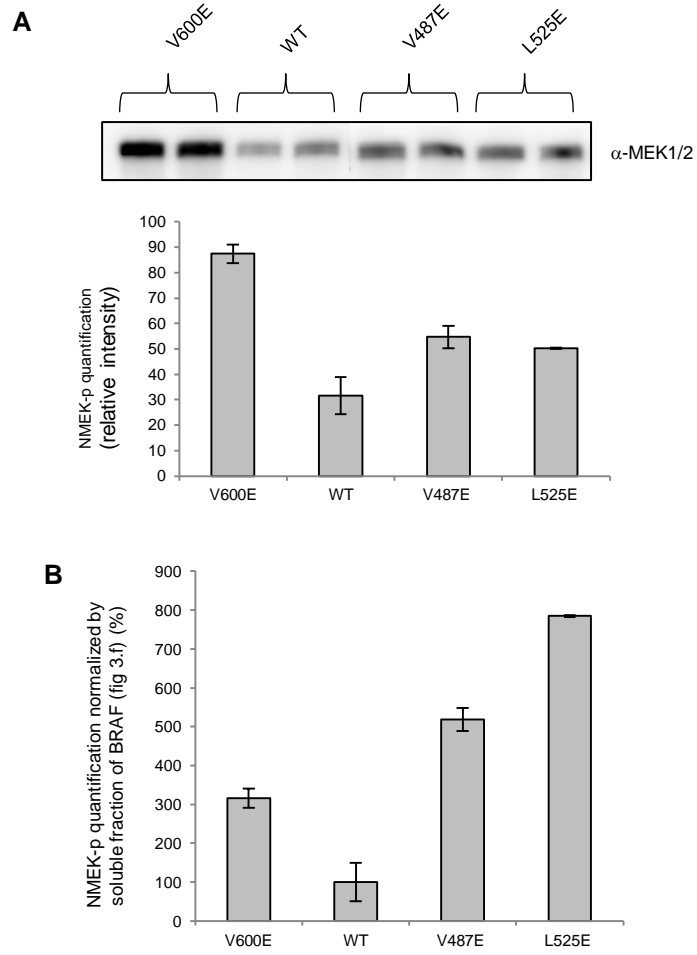

Supplement: supp [file elife-12814-supp-v1.zip › elife_poa_e12814_Figure_4_figure_supplement_3.pdf]

**Figure 1-figure supplement 3 – Kiel *et al.***

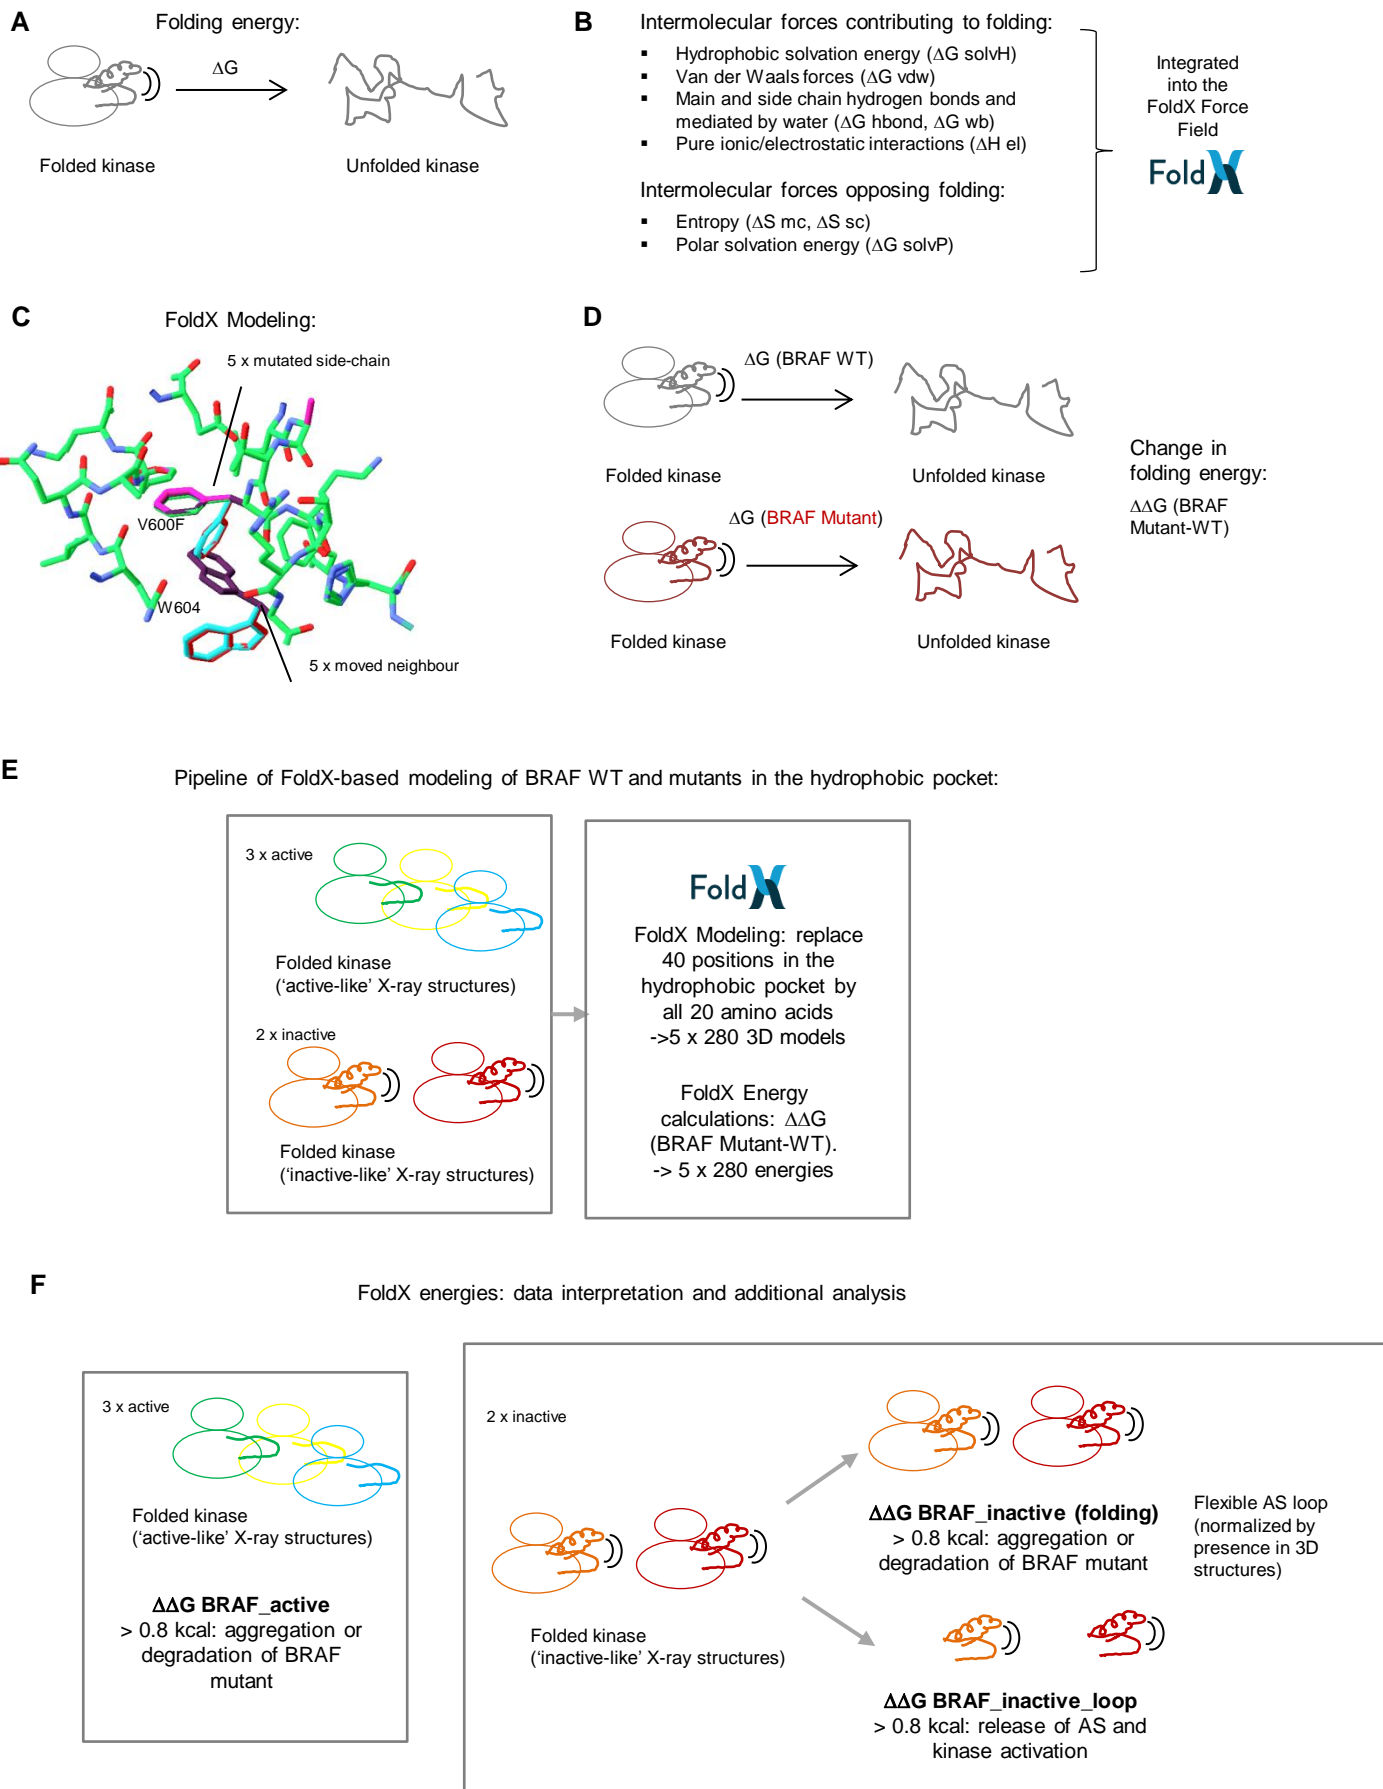

Supplement: supp [file elife-12814-supp-v1.zip]
